# Supplementary material for: Regional differences in healthcare costs further explained: The contribution of health, lifestyle, loneliness and mastery
Source: Springer Nature journal article supplement (doi:10.1007/s12508-022-00369-4), 2022-11-02
Supplement: MOESM1 [file 23669986]

## Appendix

**Table A1. Descriptive data (n = 334,721) based on unweighted data.**

| Sample                                                     |                                  | N           | (%)         |
|------------------------------------------------------------|----------------------------------|-------------|-------------|
| <b>Gender</b> <sup>§</sup>                                 | Male                             | 159,251     | (47.6%)     |
|                                                            | Female                           | 175,470     | (52.4%)     |
| <b>Migration background</b> <sup>§</sup>                   | Dutch-born                       | 294,573     | (88.0%)     |
|                                                            | Western migration background     | 28,204      | (8.4%)      |
|                                                            | Non-western migration background | 11,944      | (3.6%)      |
| <b>Marital status</b> <sup>*</sup>                         | Married/living together          | 224,234     | (67.0%)     |
|                                                            | Never married                    | 35,899      | (10.7%)     |
|                                                            | Widowed                          | 23,052      | (6.9%)      |
|                                                            | Divorced                         | 31,356      | (9.4%)      |
| <b>Highest attained level of education</b> <sup>*</sup>    | Primary school                   | 19,061      | (5.7%)      |
|                                                            | Lower vocational education       | 102,886     | (30.7%)     |
|                                                            | Middle vocational/secondary      | 106,341     | (31.8%)     |
|                                                            | Higher vocational/university     | 106,433     | (31.8%)     |
| <b>Standardized household income quartile</b> <sup>§</sup> | 0-25%                            | 42,250      | (12.6%)     |
|                                                            | 26-50%                           | 84,243      | (25.2%)     |
|                                                            | 51-75%                           | 98,107      | (29.3%)     |
|                                                            | 76-100%                          | 110,121     | (32.9%)     |
| <b>Self-perceived income inadequacy</b> <sup>*</sup>       | Inadequate. major concerns       | 9,490       | (2.8%)      |
|                                                            | Inadequate. some concerns        | 34,273      | (10.2%)     |
|                                                            | Adequate. minor concerns         | 115,299     | (34.4%)     |
|                                                            | Adequate. no concerns            | 175,659     | (52.5%)     |
| <b>Chronic disease</b> <sup>*</sup>                        | None                             | 203,330     | (60.7%)     |
|                                                            | At least one                     | 131,391     | (39.3%)     |
| <b>Self-rated health</b> <sup>*</sup>                      | Very (good)                      | 247,707     | (74.0%)     |
|                                                            | Fair. (very) poor                | 87,104      | (26.0%)     |
| <b>Psychological distress</b> <sup>*</sup>                 | No. low or moderate risk         | 319,533     | (95.5%)     |
|                                                            | High                             | 15,188      | (4.5%)      |
| <b>Physical activity</b> <sup>*</sup>                      | Insufficient                     | 94,343      | (28.2%)     |
|                                                            | Sufficient                       | 240,378     | (71.8%)     |
| <b>BMI</b> <sup>*</sup>                                    | Underweight (<18.5)              | 4,200       | (1.3%)      |
|                                                            | Normal (18.5-25)                 | 152,321     | (45.5%)     |
|                                                            | Overweight (25-30)               | 128,977     | (38.5%)     |
|                                                            | Obese (30>)                      | 49,223      | (14.7%)     |
| <b>Alcohol consumption</b> <sup>*</sup>                    | Never                            | 32,663      | (9.8%)      |
|                                                            | Moderate                         | 275,392     | (82.3%)     |
|                                                            | Excessive                        | 26,666      | (8.0%)      |
| <b>Smoking</b> <sup>*</sup>                                | Never smoked                     | 135,642     | (40.5%)     |
|                                                            | Former smoker                    | 144,994     | (43.3%)     |
|                                                            | Current smoker                   | 54,085      | (16.2%)     |
|                                                            |                                  | <b>Mean</b> | <b>(sd)</b> |
| <b>Age</b> <sup>§</sup>                                    |                                  | 59.2        | (16.9)      |
| <b>Loneliness</b> <sup>*</sup>                             |                                  | 2.8         | (3.1)       |
| <b>Mastery</b> <sup>*</sup>                                |                                  | 26.7        | (5.2)       |

§Registry data. \*Self-reported data (Health Survey 2016).

**Table A2. Missing data (n=457.150)**

| <b>Variable</b>                                           | <b>N</b> | <b>(%)</b> |
|-----------------------------------------------------------|----------|------------|
| <b>Region*</b>                                            | 0        | (0)        |
| <b>Age<sup>§</sup></b>                                    | 0        | (0)        |
| <b>Gender<sup>§</sup></b>                                 | 0        | (0)        |
| <b>Migration background<sup>§</sup></b>                   | 0        | (0)        |
| <b>Marital state*</b>                                     | 11,192   | (2.4)      |
| <b>Highest attained level of education *</b>              | 31,422   | (6.9)      |
| <b>Standardized household income quartile<sup>§</sup></b> | 737      | (0.2)      |
| <b>Income inadequacy*</b>                                 | 35,643   | (7.8)      |
| <b>Physical activity*</b>                                 | 33,488   | (7.3)      |
| <b>BMI*</b>                                               | 21,261   | (4.7)      |
| <b>Alcohol consumption*</b>                               | 36,967   | (8.1)      |
| <b>Smoking*</b>                                           | 32,605   | (7.1)      |
| <b>Chronic disease*</b>                                   | 8,808    | (1.9)      |
| <b>Self-rated health*</b>                                 | 5,730    | (1.3)      |
| <b>Psychological distress*</b>                            | 20,103   | (4.4)      |
| <b>Loneliness*</b>                                        | 36,364   | (8.0)      |
| <b>Mastery*</b>                                           | 36,612   | (8.0)      |

§Registry data. \*Self-reported data (Health Survey 2016).

**Table A3. Incidence Rate Ratios per region for total healthcare costs compared to Zuid-Limburg. Results from Poisson regressions (n= 334,721).**

|                           | IRR (95%CI) | Model 1          | Model 2          | Model 3a         | Model 3b         | Model 3c         |
|---------------------------|-------------|------------------|------------------|------------------|------------------|------------------|
| Zuid-Limburg              |             | 1.00 (ref)       | 1.00 (ref)       | 1.00 (ref)       | 1.00 (ref)       | 1.00 (ref)       |
| Zuid-Holland-Zuid         |             | 0.78 (0.71-0.85) | 0.82 (0.76-0.89) | 0.91 (0.84-0.98) | 0.89 (0.82-0.96) | 0.84 (0.78-0.92) |
| Zeeland                   |             | 0.91 (0.84-0.99) | 0.90 (0.83-0.97) | 0.94 (0.87-1.01) | 0.97 (0.90-1.05) | 0.92 (0.85-0.99) |
| Zaanstreek-Waterland      |             | 0.86 (0.80-0.93) | 0.91 (0.85-0.98) | 0.98 (0.92-1.05) | 0.94 (0.88-1.00) | 0.93 (0.87-0.99) |
| West-Brabant              |             | 0.89 (0.82-0.95) | 0.92 (0.86-0.99) | 0.96 (0.89-1.03) | 1.01 (0.94-1.08) | 0.94 (0.87-1.01) |
| Utrecht                   |             | 0.79 (0.74-0.84) | 0.92 (0.86-0.97) | 0.99 (0.93-1.05) | 0.96 (0.91-1.02) | 0.94 (0.88-0.99) |
| Twente                    |             | 0.89 (0.80-0.99) | 0.96 (0.86-1.07) | 1.06 (0.95-1.18) | 1.00 (0.90-1.11) | 0.97 (0.87-1.08) |
| Rotterdam-Rijnmond        |             | 0.90 (0.84-0.96) | 0.94 (0.88-1.00) | 1.01 (0.95-1.08) | 0.97 (0.91-1.04) | 0.96 (0.90-1.03) |
| Noord- en Oost-Gelderland |             | 0.84 (0.79-0.90) | 0.90 (0.84-0.95) | 0.98 (0.92-1.05) | 0.91 (0.85-0.97) | 0.91 (0.85-0.97) |
| Limburg-Noord             |             | 0.93 (0.86-1.01) | 0.95 (0.87-1.02) | 0.99 (0.92-1.07) | 0.98 (0.91-1.06) | 0.97 (0.90-1.05) |
| Kennemerland              |             | 0.82 (0.76-0.88) | 0.88 (0.82-0.95) | 0.99 (0.92-1.06) | 0.95 (0.88-1.01) | 0.91 (0.85-0.98) |
| IJsselland                |             | 0.84 (0.77-0.91) | 0.95 (0.87-1.03) | 1.04 (0.96-1.12) | 0.95 (0.88-1.03) | 0.97 (0.89-1.05) |
| Hollands Noorden          |             | 0.77 (0.72-0.83) | 0.82 (0.77-0.88) | 0.90 (0.84-0.96) | 0.87 (0.81-0.93) | 0.84 (0.79-0.90) |
| Holland-Midden            |             | 0.80 (0.75-0.86) | 0.89 (0.83-0.95) | 0.97 (0.91-1.04) | 0.90 (0.84-0.96) | 0.90 (0.84-0.96) |
| Hart voor Brabant         |             | 0.85 (0.76-0.94) | 0.90 (0.81-1.00) | 0.95 (0.86-1.05) | 0.97 (0.88-1.08) | 0.92 (0.83-1.02) |
| Haaglanden                |             | 0.90 (0.83-0.97) | 0.98 (0.91-1.05) | 1.05 (0.98-1.13) | 0.99 (0.92-1.06) | 0.98 (0.91-1.06) |
| Groningen                 |             | 0.81 (0.75-0.88) | 0.88 (0.82-0.96) | 0.96 (0.89-1.04) | 0.89 (0.83-0.96) | 0.92 (0.85-0.99) |
| Gooi en Vechtstreek       |             | 0.85 (0.77-0.94) | 0.89 (0.81-0.98) | 0.98 (0.89-1.07) | 0.96 (0.87-1.05) | 0.92 (0.83-1.01) |
| Gelderland-Zuid           |             | 0.87 (0.79-0.96) | 0.97 (0.88-1.07) | 1.05 (0.95-1.06) | 1.01 (0.92-1.12) | 0.98 (0.89-1.08) |
| Gelderland-Midden         |             | 0.82 (0.76-0.90) | 0.90 (0.83-0.97) | 0.98 (0.90-1.06) | 0.91 (0.84-0.99) | 0.91 (0.84-0.98) |
| Friesland                 |             | 0.85 (0.78-0.91) | 0.87 (0.80-0.94) | 0.98 (0.91-1.06) | 0.91 (0.85-0.99) | 0.89 (0.83-0.97) |
| Flevoland                 |             | 0.78 (0.69-0.87) | 0.89 (0.80-0.99) | 0.95 (0.85-1.06) | 0.90 (0.81-1.00) | 0.90 (0.81-1.01) |
| Drenthe                   |             | 0.85 (0.77-0.95) | 0.86 (0.78-0.96) | 0.96 (0.87-1.06) | 0.92 (0.83-1.02) | 0.89 (0.80-0.99) |
| Brabant-Zuidoost          |             | 0.87 (0.81-0.93) | 0.92 (0.86-0.99) | 0.95 (0.89-1.02) | 1.00 (0.93-1.06) | 0.94 (0.88-0.99) |
| Amsterdam                 |             | 0.86 (0.79-0.94) | 0.99 (0.91-1.09) | 1.10 (1.01-1.21) | 1.06 (0.97-1.15) | 1.03 (0.94-1.12) |

**Tabel A3 continued.**

|                           | IRR (95%CI) | Model 4          | Model 5a         | Model 5b         | Model 5c         | Model 6          |
|---------------------------|-------------|------------------|------------------|------------------|------------------|------------------|
| Zuid-Limburg              |             | 1.00 (ref)       | 1.00 (ref)       | 1.00 (ref)       | 1.00 (ref)       | 1.00 (ref)       |
| Zuid-Holland-Zuid         |             | 0.93 (0.86-1.01) | 0.93 (0.86-1.01) | 0.93 (0.86-1.01) | 0.93 (0.86-1.00) | 0.92 (0.86-0.99) |
| Zeeland                   |             | 0.99 (0.92-1.07) | 1.02 (0.95-1.10) | 1.00 (0.93-1.07) | 0.99 (0.92-1.06) | 1.02 (0.95-1.09) |
| Zaanstreek-Waterland      |             | 0.98 (0.92-1.05) | 1.00 (0.93-1.07) | 0.98 (0.92-1.05) | 0.99 (0.93-1.06) | 1.00 (0.93-1.06) |
| West-Brabant              |             | 1.03 (0.96-1.10) | 1.04 (0.97-1.12) | 1.03 (0.96-1.10) | 1.02 (0.95-1.10) | 1.04 (0.97-1.11) |
| Utrecht                   |             | 1.00 (0.95-1.06) | 1.02 (0.96-1.08) | 1.00 (0.94-1.06) | 1.01 (0.95-1.07) | 1.01 (0.96-1.08) |
| Twente                    |             | 1.06 (0.95-1.18) | 1.09 (0.98-1.21) | 1.06 (0.95-1.17) | 1.06 (0.96-1.18) | 1.08 (0.97-1.20) |
| Rotterdam-Rijnmond        |             | 1.02 (0.96-1.08) | 1.02 (0.96-1.09) | 1.02 (0.95-1.08) | 1.02 (0.96-1.09) | 1.02 (0.96-1.09) |
| Noord- en Oost-Gelderland |             | 0.97 (0.91-1.03) | 0.99 (0.93-1.05) | 0.96 (0.91-1.03) | 0.97 (0.91-1.03) | 0.98 (0.92-1.04) |
| Limburg-Noord             |             | 1.01 (0.93-1.09) | 1.02 (0.95-1.11) | 1.01 (0.93-1.09) | 1.01 (0.94-1.09) | 1.03 (0.95-1.11) |
| Kennemerland              |             | 1.01 (0.94-1.08) | 1.03 (0.96-1.10) | 1.00 (0.94-1.08) | 1.02 (0.95-1.09) | 1.03 (0.96-1.10) |
| IJsselland                |             | 1.02 (0.94-1.10) | 1.04 (0.96-1.12) | 1.01 (0.94-1.09) | 1.01 (0.94-1.09) | 1.02 (0.95-1.10) |
| Hollands Noorden          |             | 0.91 (0.85-0.97) | 0.93 (0.87-0.99) | 0.91 (0.85-0.97) | 0.92 (0.86-0.98) | 0.93 (0.87-0.99) |
| Holland-Midden            |             | 0.96 (0.90-1.02) | 0.98 (0.92-1.04) | 0.95 (0.89-1.02) | 0.94 (0.88-1.00) | 0.95 (0.89-1.01) |
| Hart voor Brabant         |             | 1.00 (0.90-1.11) | 1.02 (0.92-1.13) | 1.00 (0.90-1.10) | 1.00 (0.90-1.11) | 1.02 (0.92-1.13) |
| Haaglanden                |             | 1.04 (0.96-1.12) | 1.05 (0.98-1.13) | 1.03 (0.96-1.11) | 1.05 (0.97-1.13) | 1.06 (0.98-1.14) |
| Groningen                 |             | 0.96 (0.89-1.04) | 0.98 (0.91-1.05) | 0.96 (0.89-1.03) | 0.97 (0.90-1.05) | 0.98 (0.91-1.06) |
| Gooi en Vechtstreek       |             | 1.00 (0.91-1.10) | 1.00 (0.91-1.10) | 1.00 (0.91-1.09) | 1.01 (0.92-1.11) | 1.00 (0.91-1.10) |
| Gelderland-Zuid           |             | 1.06 (0.96-1.17) | 1.07 (0.97-1.18) | 1.06 (0.96-1.16) | 1.06 (0.96-1.17) | 1.06 (0.96-1.17) |
| Gelderland-Midden         |             | 0.97 (0.89-1.04) | 0.98 (0.91-1.06) | 0.96 (0.89-1.03) | 0.97 (0.89-1.04) | 0.97 (0.90-1.05) |
| Friesland                 |             | 0.99 (0.91-1.06) | 1.00 (0.93-1.08) | 0.98 (0.91-1.06) | 0.99 (0.92-1.06) | 1.00 (0.93-1.07) |
| Flevoland                 |             | 0.94 (0.85-1.05) | 0.95 (0.85-1.05) | 0.94 (0.85-1.04) | 0.95 (0.85-1.06) | 0.96 (0.86-1.06) |
| Drenthe                   |             | 0.98 (0.89-1.08) | 0.99 (0.89-1.09) | 0.98 (0.88-1.08) | 0.99 (0.89-1.09) | 0.99 (0.89-1.09) |
| Brabant-Zuidoost          |             | 1.01 (0.95-1.17) | 1.03 (0.97-1.10) | 1.01 (0.94-1.07) | 1.00 (0.94-1.07) | 1.02 (0.96-1.09) |
| Amsterdam                 |             | 1.12 (1.03-1.22) | 1.14 (1.04-1.25) | 1.12 (1.02-1.22) | 1.13 (1.04-1.24) | 1.14 (1.04-1.25) |

IRR: Incidence Rate Ratio. CI: confidence interval. Model 1: region. Model 2: region, demographic factors, and SES. Model 3a: region, demographic factors, SES, and self-rated health. Model 3b: region, demographic factors, SES and chronic disease. Model 3c: region, demographic factors, SES and psychological distress. Model 4: region, demographic factors, SES, self-rated health, chronic disease, and psychological distress. Model 5a: region, demographic factors, SES, self-rated health, chronic disease, psychological distress, and lifestyle. Model 5b: region, demographic factors, SES, self-rated health, chronic disease, psychological distress, and loneliness. Model 5c: region, demographic factors, SES, self-rated health, chronic disease, psychological distress, and mastery. Model 6: region, demographic factors, SES, self-rated health, chronic disease, psychological distress, lifestyle, loneliness, and mastery. Registry data: age, gender, migration background and household income. Self-reported data: marital status, education, income inadequacy, self-rated health, chronic disease, psychological distress, lifestyle, loneliness, and mastery.

**Table A4. Incidence Rate Ratios per region for GP consult costs compared to Zuid-Limburg. Results from Zero-inflated negative binomial regressions (n= 334,721).**

| IRR (95% CI)                  | Model 1             |                     | Model 2             |                     | Model 3a            |                     | Model 3b            |                     | Model 3c            |                     |
|-------------------------------|---------------------|---------------------|---------------------|---------------------|---------------------|---------------------|---------------------|---------------------|---------------------|---------------------|
|                               |                     | Infl.               |                     | Infl.               |                     | Infl.               |                     | Infl.               |                     | Infl.               |
| Zuid-Limburg                  | 1.00 (ref)          | 1.00 (ref)          | 1.00 (ref)          | 1.00 (ref)          | 1.00 (ref)          | 1.00 (ref)          | 1.00 (ref)          | 1.00 (ref)          | 1.00 (ref)          | 1.00 (ref)          |
| Zuid-Holland-Zuid             | 0.82<br>(0.79-0.86) | 1.14<br>(1.02-1.28) | 0.85<br>(0.82-0.89) | 1.13<br>(1.01-1.27) | 0.89<br>(0.85-0.92) | 1.10<br>(0.98-1.23) | 0.87<br>(0.84-0.91) | 1.10<br>(0.98-1.23) | 0.87<br>(0.83-0.91) | 1.12<br>(1.00-1.25) |
| Zeeland                       | 0.81<br>(0.77-0.84) | 1.18<br>(1.07-1.31) | 0.81<br>(0.78-0.84) | 1.22<br>(1.10-1.35) | 0.83<br>(0.80-0.86) | 1.21<br>(1.09-1.35) | 0.83<br>(0.08-0.86) | 1.19<br>(1.07-1.32) | 0.82<br>(0.79-0.85) | 1.22<br>(1.10-1.35) |
| Zaanstreek-<br>Waterland      | 0.84<br>(0.81-0.87) | 1.08<br>(0.99-1.19) | 0.86<br>(0.83-0.89) | 1.10<br>(1.00-1.21) | 0.89<br>(0.86-0.92) | 1.08<br>(0.98-1.18) | 0.87<br>(0.84-0.90) | 1.10<br>(1.00-1.20) | 0.87<br>(0.84-0.90) | 1.10<br>(1.00-1.21) |
| West-Brabant                  | 0.76<br>(0.74-0.79) | 1.13<br>(1.02-1.24) | 0.80<br>(0.83-0.89) | 1.13<br>(1.02-1.24) | 0.81<br>(0.78-0.84) | 1.12<br>(1.02-1.24) | 0.82<br>(0.79-0.84) | 1.09<br>(0.99-1.20) | 0.80<br>(0.78-0.83) | 1.13<br>(1.02-1.24) |
| Utrecht                       | 0.79<br>(0.77-0.81) | 1.29<br>(1.20-1.39) | 0.85<br>(0.83-0.88) | 1.21<br>(1.12-1.30) | 0.87<br>(0.85-0.90) | 1.18<br>(1.01-1.28) | 0.86<br>(0.84-0.89) | 1.19<br>(1.10-1.28) | 0.86<br>(0.84-0.88) | 1.20<br>(1.12-1.30) |
| Twente                        | 0.74<br>(0.71-0.77) | 1.50<br>(1.37-1.65) | 0.78<br>(0.75-0.81) | 1.46<br>(1.33-1.61) | 0.81<br>(0.78-0.84) | 1.42<br>(1.30-1.57) | 0.79<br>(0.76-0.82) | 1.45<br>(1.32-1.60) | 0.79<br>(0.76-0.82) | 1.47<br>(1.34-1.62) |
| Rotterdam-<br>Rijnmond        | 0.87<br>(0.84-0.90) | 2.11<br>(1.97-2.27) | 0.87<br>(0.85-0.90) | 2.21<br>(2.05-2.38) | 0.90<br>(0.87-0.92) | 2.18<br>(2.03-2.35) | 0.88<br>(0.86-0.91) | 2.22<br>(2.06-2.40) | 0.88<br>(0.86-0.91) | 2.20<br>(2.05-2.37) |
| Noord- en Oost-<br>Gelderland | 0.76<br>(0.74-0.79) | 1.25<br>(1.14-1.36) | 0.80<br>(0.77-0.82) | 1.24<br>(1.14-1.35) | 0.82<br>(0.80-0.85) | 1.21<br>(1.11-1.31) | 0.80<br>(0.77-0.82) | 1.24<br>(1.14-1.36) | 0.80<br>(0.77-0.82) | 1.24<br>(1.14-1.35) |
| Limburg-Noord                 | 0.88<br>(0.85-0.91) | 1.04<br>(0.96-1.14) | 0.89<br>(0.87-0.92) | 1.05<br>(0.96-1.15) | 0.92<br>(0.89-0.94) | 1.04<br>(0.95-1.13) | 0.91<br>(0.88-0.93) | 1.04<br>(0.95-1.14) | 0.90<br>(0.88-0.93) | 1.05<br>(0.96-1.15) |
| Kennemerland                  | 0.79<br>(0.76-0.82) | 1.08<br>(0.99-1.18) | 0.83<br>(0.81-0.86) | 1.07<br>(0.98-1.17) | 0.87<br>(0.84-0.90) | 1.04<br>(0.95-1.14) | 0.85<br>(0.82-0.88) | 1.05<br>(0.96-1.15) | 0.84<br>(0.81-0.87) | 1.07<br>(0.97-1.17) |
| IJsselland                    | 0.74<br>(0.71-0.78) | 1.28<br>(1.15-1.43) | 0.82<br>(0.78-0.85) | 1.20<br>(1.08-1.34) | 0.84<br>(0.81-0.88) | 1.18<br>(1.06-1.32) | 0.82<br>(0.78-0.85) | 1.21<br>(1.09-1.35) | 0.82<br>(0.79-0.86) | 1.20<br>(1.08-1.34) |
| Hollands Noorden              | 0.78<br>(0.75-0.81) | 1.25<br>(1.14-1.36) | 0.80<br>(0.77-0.83) | 1.25<br>(1.15-1.36) | 0.83<br>(0.80-0.85) | 1.22<br>(1.12-1.33) | 0.81<br>(0.79-0.84) | 1.22<br>(1.12-1.34) | 0.81<br>(0.78-0.84) | 1.25<br>(1.14-1.36) |
| Holland-Midden                | 0.79<br>(0.77-0.82) | 1.22<br>(1.12-1.32) | 0.83<br>(0.81-0.86) | 1.17<br>(1.08-1.27) | 0.91<br>(0.88-0.94) | 1.14<br>(1.05-1.23) | 0.83<br>(0.81-0.86) | 1.18<br>(1.09-1.28) | 0.84<br>(0.81-0.86) | 1.17<br>(1.08-1.27) |
| Hart voor Brabant             | 0.85<br>(0.82-0.88) | 1.10<br>(1.01-1.19) | 0.89<br>(0.86-0.91) | 1.07<br>(0.98-1.16) | 0.88<br>(0.85-0.91) | 1.06<br>(0.97-1.15) | 0.91<br>(0.88-0.94) | 1.04<br>(0.96-1.13) | 0.89<br>(0.87-0.92) | 1.07<br>(0.98-1.16) |
| Haaglanden                    | 0.87<br>(0.83-0.90) | 1.11<br>(1.11-1.13) | 0.85<br>(0.82-0.89) | 1.12<br>(1.11-1.13) | 0.90<br>(0.87-0.93) | 1.12<br>(1.11-1.13) | 0.86<br>(0.83-0.89) | 1.12<br>(1.12-1.13) | 0.85<br>(0.82-0.88) | 1.12<br>(1.11-1.13) |
| Groningen                     | 0.85<br>(0.82-0.88) | 1.38<br>(1.26-1.52) | 0.88<br>(0.85-0.92) | 1.31<br>(1.19-1.43) | 0.90<br>(0.86-0.94) | 1.28<br>(1.17-1.40) | 0.88<br>(0.85-0.92) | 1.32<br>(1.20-1.45) | 0.90<br>(0.86-0.93) | 1.29<br>(1.18-1.42) |
| Gooi en<br>Vechtstreek        | 0.84<br>(0.81-0.88) | 1.10<br>(0.97-1.25) | 0.88<br>(0.84-0.92) | 1.10<br>(0.97-1.25) | 0.84<br>(0.81-0.88) | 1.07<br>(0.95-1.21) | 0.90<br>(0.86-0.94) | 1.07<br>(0.95-1.21) | 0.88<br>(0.84-0.92) | 1.10<br>(0.97-1.24) |
| Gelderland-Zuid               | 0.85<br>(0.82-0.88) | 1.25<br>(1.14-1.37) | 0.89<br>(0.86-0.92) | 1.19<br>(1.08-1.30) | 0.91<br>(0.88-0.94) | 1.16<br>(1.06-1.27) | 0.90<br>(0.87-0.93) | 1.17<br>(1.07-1.28) | 0.89<br>(0.86-0.92) | 1.19<br>(1.09-1.30) |

|                       |                     |                     |                     |                     |                     |                     |                     |                     |                     |                     |
|-----------------------|---------------------|---------------------|---------------------|---------------------|---------------------|---------------------|---------------------|---------------------|---------------------|---------------------|
| Gelderland-<br>Midden | 0.83<br>(0.79-0.87) | 1.33<br>(1.191-.48) | 0.86<br>(0.83-0.90) | 1.29<br>(1.16-1.44) | 0.88<br>(0.85-0.92) | 1.26<br>(1.13-1.40) | 0.86<br>(0.83-0.90) | 1.29<br>(1.16-1.44) | 0.86<br>(0.83-0.90) | 1.29<br>(1.16-1.44) |
| Friesland             | 0.80<br>(0.77-0.83) | 1.31<br>(1.20-1.44) | 0.81<br>(0.79-0.84) | 1.32<br>(1.21-1.44) | 0.84<br>(0.82-0.87) | 1.28<br>(1.17-1.40) | 0.82<br>(0.80-0.85) | 1.30<br>(1.19-1.42) | 0.82<br>(0.79-0.85) | 1.31<br>(1.20-1.43) |
| Flevoland             | 0.84<br>(0.78-0.91) | 0.98<br>(0.80-1.19) | 0.92<br>(0.86-0.99) | 0.93<br>(0.76-1.15) | 0.95<br>(0.89-1.02) | 0.91<br>(0.75-1.12) | 0.92<br>(0.86-0.99) | 0.93<br>(0.76-1.15) | 0.93<br>(0.86-0.99) | 0.93<br>(0.76-1.15) |
| Drenthe               | 0.83<br>(0.79-0.87) | 1.11<br>(0.98-1.25) | 0.85<br>(0.81-0.89) | 1.14<br>(1.00-1.29) | 0.88<br>(0.85-0.93) | 1.10<br>(0.97-1.25) | 0.87<br>(0.83-0.91) | 1.12<br>(0.99-1.26) | 0.86<br>(0.82-0.90) | 1.13<br>(1.00-1.28) |
| Brabant-Zuidoost      | 0.79<br>(0.77-0.82) | 1.21<br>(1.11-1.32) | 0.82<br>(0.80-0.85) | 1.18<br>(1.08-1.28) | 0.84<br>(0.82-0.87) | 1.18<br>(1.09-1.29) | 0.84<br>(0.82-0.87) | 1.15<br>(1.06-1.25) | 0.83<br>(0.81-0.86) | 1.18<br>(1.09-1.29) |
| Amsterdam             | 0.79<br>(0.76-0.82) | 1.30<br>(1.18-1.43) | 0.83<br>(0.80-0.86) | 1.24<br>(1.12-1.36) | 0.87<br>(0.84-0.90) | 1.19<br>(1.08-1.32) | 0.86<br>(0.82-0.89) | 1.21<br>(1.10-1.33) | 0.85<br>(0.82-0.88) | 1.22<br>(1.11-1.35) |

**Table A4 continued.**

| IRR<br>IRR (95%CI)            | <u>Model 4</u>      |                     | <u>Model 5a</u>     |                     | <u>Model 5b</u>     |                     | <u>Model 5c</u>     |                     | <u>Model 6</u>      |                     |
|-------------------------------|---------------------|---------------------|---------------------|---------------------|---------------------|---------------------|---------------------|---------------------|---------------------|---------------------|
|                               |                     | Infl.               |                     | Infl.               |                     | Infl.               |                     | Infl.               |                     | Infl.               |
| Zuid-Limburg                  | 1.00 (ref)          | 1.00 (ref)          | 1.00 (ref)          | 1.00 (ref)          | 1.00 (ref)          | 1.00 (ref)          | 1.00 (ref)          | 1.00 (ref)          | 1.00 (ref)          | 1.00 (ref)          |
| Zuid-Holland-<br>Zuid         | 0.90<br>(0.86-0.93) | 1.08<br>(0.97-1.21) | 0.90<br>(0.86-0.93) | 1.08<br>(0.97-1.21) | 0.90<br>(0.86-0.94) | 1.08<br>(0.97-1.21) | 0.90<br>(0.86-0.93) | 1.08<br>(0.97-1.21) | 0.90<br>(0.86-0.93) | 1.09<br>(0.97-1.22) |
| Zeeland                       | 0.84<br>(0.81-0.87) | 1.19<br>(1.07-1.32) | 0.84<br>(0.81-0.87) | 1.19<br>(1.08-1.33) | 0.84<br>(0.81-0.87) | 1.19<br>(1.07-1.32) | 0.83<br>(0.80-0.86) | 1.20<br>(1.08-1.33) | 0.84<br>(0.80-0.87) | 1.20<br>(1.08-1.33) |
| Zaanstreek-<br>Waterland      | 0.89<br>(0.86-0.92) | 1.08<br>(0.99-1.19) | 0.89<br>(0.87-0.92) | 1.09<br>(0.99-1.19) | 0.90<br>(0.87-0.93) | 1.08<br>(0.99-1.19) | 0.89<br>(0.87-0.92) | 1.08<br>(0.99-1.19) | 0.90<br>(0.87-0.93) | 1.09<br>(0.99-1.19) |
| West-Brabant                  | 0.82<br>(0.79-0.85) | 1.10<br>(0.99-1.21) | 0.82<br>(0.79-0.85) | 1.10<br>(1.00-1.21) | 0.82<br>(0.79-0.85) | 1.10<br>(0.99-1.21) | 0.82<br>(0.79-0.85) | 1.10<br>(1.00-1.21) | 0.82<br>(0.79-0.85) | 1.10<br>(1.00-1.21) |
| Utrecht                       | 0.88<br>(0.85-0.90) | 1.18<br>(1.09-1.27) | 0.88<br>(0.86-0.90) | 1.18<br>(1.10-1.27) | 0.88<br>(0.86-0.90) | 1.18<br>(1.09-1.27) | 0.88<br>(0.86-0.90) | 1.18<br>(1.09-1.27) | 0.88<br>(0.86-0.91) | 1.18<br>(1.10-1.27) |
| Twente                        | 0.81<br>(0.78-0.84) | 1.44<br>(1.31-1.59) | 0.81<br>(0.79-0.84) | 1.45<br>(1.32-1.60) | 0.81<br>(0.78-0.84) | 1.44<br>(1.31-1.59) | 0.81<br>(0.78-0.84) | 1.44<br>(1.31-1.59) | 0.81<br>(0.79-0.84) | 1.46<br>(1.32-1.60) |
| Rotterdam-<br>Rijnmond        | 0.90<br>(0.88-0.93) | 2.20<br>(2.04-2.37) | 0.90<br>(0.88-0.93) | 2.21<br>(2.05-2.38) | 0.90<br>(0.88-0.93) | 2.20<br>(2.04-2.37) | 0.90<br>(0.88-0.93) | 2.20<br>(2.04-2.37) | 0.90<br>(0.88-0.93) | 2.21<br>(2.05-2.39) |
| Noord- en Oost-<br>Gelderland | 0.81<br>(0.79-0.84) | 1.23<br>(1.13-1.34) | 0.82<br>(0.79-0.84) | 1.24<br>(1.14-1.35) | 0.82<br>(0.79-0.84) | 1.23<br>(1.13-1.34) | 0.81<br>(0.79-0.83) | 1.23<br>(1.13-1.34) | 0.81<br>(0.79-0.84) | 1.24<br>(1.14-1.35) |
| Limburg-Noord                 | 0.92<br>(0.90-0.95) | 1.03<br>(0.95-1.13) | 0.92<br>(0.90-0.95) | 1.04<br>(0.95-1.13) | 0.92<br>(0.90-0.95) | 1.03<br>(0.95-1.13) | 0.92<br>(0.90-0.95) | 1.03<br>(0.95-1.13) | 0.92<br>(0.90-0.95) | 1.04<br>(0.95-1.14) |
| Kennemerland                  | 0.87<br>(0.84-0.90) | 1.04<br>(0.95-1.13) | 0.87<br>(0.84-0.90) | 1.04<br>(0.95-1.14) | 0.87<br>(0.85-0.90) | 1.04<br>(0.95-1.13) | 0.87<br>(0.85-0.90) | 1.03<br>(0.95-1.13) | 0.88<br>(0.85-0.90) | 1.04<br>(0.95-1.14) |
| IJsselland                    | 0.83<br>(0.80-0.87) | 1.20<br>(1.08-1.34) | 0.84<br>(0.80-0.87) | 1.21<br>(1.09-1.35) | 0.84<br>(0.80-0.87) | 1.20<br>(1.08-1.34) | 0.83<br>(0.80-0.87) | 1.20<br>(1.08-1.34) | 0.84<br>(0.80-0.87) | 1.22<br>(1.09-1.36) |
| Hollands Noorden              | 0.83<br>(0.81-0.86) | 1.21<br>(1.11-1.33) | 0.83<br>(0.81-0.86) | 1.22<br>(1.12-1.33) | 0.83<br>(0.81-0.86) | 1.21<br>(1.11-1.33) | 0.84<br>(0.81-0.86) | 1.21<br>(1.11-1.32) | 0.84<br>(0.81-0.87) | 1.22<br>(1.12-1.33) |
| Holland-Midden                | 0.85<br>(0.83-0.88) | 1.16<br>(1.07-1.26) | 0.86<br>(0.83-0.88) | 1.17<br>(1.08-1.26) | 0.85<br>(0.83-0.88) | 1.16<br>(1.07-1.26) | 0.85<br>(0.82-0.87) | 1.16<br>(1.07-1.26) | 0.85<br>(0.83-0.87) | 1.17<br>(1.08-1.27) |
| Hart voor Brabant             | 0.92<br>(0.89-0.94) | 1.04<br>(0.96-1.13) | 0.92<br>(0.89-0.95) | 1.05<br>(0.96-1.14) | 0.92<br>(0.89-0.95) | 1.04<br>(0.96-1.13) | 0.92<br>(0.89-0.94) | 1.04<br>(0.96-1.13) | 0.92<br>(0.90-0.95) | 1.05<br>(0.97-1.14) |
| Haaglanden                    | 0.87<br>(0.84-0.90) | 1.12<br>(0.84-0.90) | 0.87<br>(0.84-0.90) | 1.12<br>(1.12-1.13) | 0.87<br>(0.84-0.91) | 1.12<br>(1.12-1.13) | 0.87<br>(0.84-0.90) | 1.12<br>(1.11-1.13) | 0.87<br>(0.84-0.90) | 1.12<br>(1.12-1.13) |
| Groningen                     | 0.90<br>(0.87-0.94) | 1.30<br>(1.18-1.42) | 0.90<br>(0.87-0.94) | 1.31<br>(1.19-1.44) | 0.91<br>(0.87-0.94) | 1.30<br>(1.18-1.42) | 0.91<br>(0.87-0.94) | 1.30<br>(1.18-1.42) | 0.91<br>(0.87-0.94) | 1.31<br>(1.19-1.44) |
| Gooi en<br>Vechtstreek        | 0.91<br>(0.87-0.95) | 1.06<br>(0.94-1.20) | 0.91<br>(0.87-0.95) | 1.06<br>(0.94-1.20) | 0.91<br>(0.87-0.95) | 1.06<br>(0.94-1.20) | 0.91<br>(0.87-0.95) | 1.06<br>(0.93-1.20) | 0.92<br>(0.88-0.96) | 1.06<br>(0.94-1.20) |
| Gelderland-Zuid               | 0.91<br>(0.88-0.94) | 1.16<br>(1.06-1.27) | 0.91<br>(0.88-0.94) | 1.16<br>(1.06-1.27) | 0.91<br>(0.88-0.94) | 1.16<br>(1.06-1.27) | 0.91<br>(0.88-0.94) | 1.16<br>(1.06-1.27) | 0.91<br>(0.88-0.94) | 1.17<br>(1.07-1.27) |

|                       |                     |                     |                     |                     |                     |                     |                     |                     |                     |                     |
|-----------------------|---------------------|---------------------|---------------------|---------------------|---------------------|---------------------|---------------------|---------------------|---------------------|---------------------|
| Gelderland-<br>Midden | 0.88<br>(0.84-0.91) | 1.28<br>(1.15-1.43) | 0.88<br>(0.85-0.91) | 1.29<br>(1.15-1.44) | 0.88<br>(0.84-0.91) | 1.28<br>(1.15-1.43) | 0.87<br>(0.84-0.91) | 1.28<br>(1.15-1.43) | 0.88<br>(0.84-0.91) | 1.29<br>(1.16-1.44) |
| Friesland             | 0.84<br>(0.82-0.87) | 1.28<br>(1.17-1.40) | 0.85<br>(0.82-0.87) | 1.28<br>(1.18-1.40) | 0.85<br>(0.82-0.87) | 1.28<br>(1.17-1.40) | 0.84<br>(0.82-0.87) | 1.28<br>(1.17-1.40) | 0.85<br>(0.82-0.87) | 1.29<br>(1.18-1.41) |
| Flevoland             | 0.95<br>(0.88-1.01) | 0.92<br>(0.75-1.13) | 0.95<br>(0.88-1.01) | 0.92<br>(0.75-1.14) | 0.95<br>(0.88-1.01) | 0.92<br>(0.75-1.13) | 0.95<br>(0.88-1.01) | 0.92<br>(0.75-1.13) | 0.95<br>(0.89-1.02) | 0.93<br>(0.75-1.14) |
| Drenthe               | 0.89<br>(0.85-0.93) | 1.10<br>(0.97-1.25) | 0.89<br>(0.85-0.93) | 1.11<br>(0.98-1.25) | 0.89<br>(0.86-0.93) | 1.10<br>(0.97-1.25) | 0.90<br>(0.86-0.94) | 1.10<br>(0.97-1.24) | 0.90<br>(0.86-0.93) | 1.11<br>(0.98-1.25) |
| Brabant-Zuidoost      | 0.85<br>(0.82-0.87) | 1.16<br>(1.07-1.27) | 0.85<br>(0.83-0.88) | 1.17<br>(1.07-1.27) | 0.85<br>(0.83-0.88) | 1.16<br>(1.07-1.27) | 0.85<br>(0.82-0.87) | 1.17<br>(1.07-1.27) | 0.85<br>(0.83-0.88) | 1.17<br>(1.07-1.27) |
| Amsterdam             | 0.88<br>(0.85-0.91) | 1.19<br>(1.08-1.31) | 0.88<br>(0.85-0.91) | 1.21<br>(1.10-1.33) | 0.88<br>(0.85-0.92) | 1.19<br>(1.08-1.31) | 0.88<br>(0.85-0.91) | 1.19<br>(1.08-1.31) | 0.89<br>(0.86-0.92) | 1.21<br>(1.10-1.33) |

IRR: Incidence Rate Ratio. CI: confidence interval. Model 1: region. Model 2: region, demographic factors, and SES. Model 3a: region, demographic factors, SES, and self-rated health. Model 3b: region, demographic factors, SES and chronic disease. Model 3c: region, demographic factors, SES and psychological distress. Model 4: region, demographic factors, SES, self-rated health, chronic disease, and psychological distress. Model 5a: region, demographic factors, SES, self-rated health, chronic disease, psychological distress, and lifestyle. Model 5b: region, demographic factors, SES, self-rated health, chronic disease, psychological distress, and loneliness. Model 5c: region, demographic factors, SES, self-rated health, chronic disease, psychological distress, and mastery. Model 6: region, demographic factors, SES, self-rated health, chronic disease, psychological distress, lifestyle, loneliness, and mastery. Registry data: age, gender, migration background and household income. Self-reported data: marital status, education, income inadequacy, self-rated health, chronic disease, psychological distress, lifestyle, loneliness, and mastery.



**Table A5. Incidence Rate Ratios per region for mental healthcare costs compared to Zuid-Limburg. Results from Zero-inflated negative binomial regressions (n= 334,721).**

| IRR (95% CI)                  | Model 1             |                     | Model 2             |                     | Model 3a            |                     | Model 3b            |                     | Model 3c            |                     |
|-------------------------------|---------------------|---------------------|---------------------|---------------------|---------------------|---------------------|---------------------|---------------------|---------------------|---------------------|
|                               |                     | Infl.               |                     | Infl.               |                     | Infl.               |                     | Infl.               |                     | Infl.               |
| Zuid-Limburg                  | 1.00 (ref)          | 1.00 (ref)          | 1.00 (ref)          | 1.00 (ref)          | 1.00 (ref)          | 1.00 (ref)          | 1.00 (ref)          | 1.00 (ref)          | 1.00 (ref)          | 1.00 (ref)          |
| Zuid-Holland-Zuid             | 0.47<br>(0.36-0.62) | 1.36<br>(1.09-1.68) | 0.54<br>(0.41-0.70) | 1.22<br>(0.98-1.53) | 0.54<br>(0.42-0.70) | 1.15<br>(0.92-1.44) | 0.57<br>(0.42-0.76) | 1.18<br>(0.94-1.47) | 0.51<br>(0.40-0.65) | 1.14<br>(0.91-1.42) |
| Zeeland                       | 0.90<br>(0.64-1.28) | 1.20<br>(0.98-1.46) | 0.92<br>(0.68-1.26) | 1.02<br>(0.83-1.24) | 0.92<br>(0.68-1.24) | 1.01<br>(0.82-1.24) | 0.90<br>(0.67-1.21) | 0.99<br>(0.81-1.22) | 0.85<br>(0.64-1.13) | 1.00<br>(0.81-1.22) |
| Zaanstreek-<br>Waterland      | 0.73<br>(0.57-0.95) | 1.19<br>(1.02-1.40) | 0.75<br>(0.60-0.94) | 1.10<br>(0.93-1.29) | 0.76<br>(0.61-0.95) | 1.04<br>(0.89-1.23) | 0.74<br>(0.60-0.91) | 1.09<br>(0.93-1.28) | 0.71<br>(0.57-0.89) | 1.06<br>(0.90-1.25) |
| West-Brabant                  | 1.15<br>(0.84-1.58) | 1.44<br>(1.20-1.72) | 1.12<br>(0.86-1.45) | 1.25<br>(1.04-1.50) | 1.14<br>(0.87-1.49) | 1.25<br>(1.04-1.50) | 1.14<br>(0.88-1.46) | 1.19<br>(0.99-1.43) | 1.05<br>(0.80-1.39) | 1.24<br>(1.03-1.49) |
| Utrecht                       | 0.78<br>(0.64-0.95) | 0.99<br>(0.88-1.12) | 0.84<br>(0.70-1.00) | 0.96<br>(0.84-1.09) | 0.84<br>(0.71-1.00) | 0.91<br>(0.80-1.04) | 0.86<br>(0.72-1.02) | 0.93<br>(0.82-1.06) | 0.83<br>(0.69-1.00) | 0.90<br>(0.79-1.03) |
| Twente                        | 0.73<br>(0.55-0.96) | 1.24<br>(1.00-1.54) | 0.70<br>(0.54-0.91) | 1.17<br>(0.94-1.44) | 0.71<br>(0.56-0.89) | 1.12<br>(0.90-1.39) | 0.71<br>(0.56-0.90) | 1.17<br>(0.95-1.45) | 0.72<br>(0.55-0.94) | 1.24<br>(1.01-1.53) |
| Rotterdam-<br>Rijnmond        | 0.91<br>(0.69-1.19) | 1.15<br>(1.01-1.32) | 0.89<br>(0.72-1.11) | 1.28<br>(1.11-1.47) | 0.94<br>(0.75-1.18) | 1.23<br>(1.07-1.42) | 0.90<br>(0.73-1.11) | 1.25<br>(1.08-1.43) | 0.90<br>(0.71-1.15) | 1.22<br>(1.06-1.41) |
| Noord- en Oost-<br>Gelderland | 0.86<br>(0.66-1.12) | 1.49<br>(1.27-1.74) | 0.93<br>(0.73-1.18) | 1.24<br>(1.06-1.47) | 0.91<br>(0.71-1.15) | 1.19<br>(1.01-1.40) | 0.96<br>(0.75-1.22) | 1.28<br>(1.08-1.51) | 0.93<br>(0.72-1.21) | 1.26<br>(1.06-1.49) |
| Limburg-Noord                 | 0.90<br>(0.66-1.22) | 1.43<br>(1.23-1.67) | 0.99<br>(0.74-1.34) | 1.23<br>(1.06-1.44) | 1.01<br>(0.73-1.40) | 1.20<br>(1.02-1.40) | 1.03<br>(0.75-1.42) | 1.22<br>(1.04-1.43) | 1.03<br>(0.74-1.43) | 1.17<br>(0.99-1.37) |
| Kennemerland                  | 0.78<br>(0.55-1.11) | 1.09<br>(0.93-1.28) | 0.80<br>(0.62-1.03) | 1.01<br>(0.86-1.18) | 0.80<br>(0.64-1.01) | 0.94<br>(0.80-1.11) | 0.81<br>(0.64-1.01) | 0.97<br>(0.82-1.14) | 0.77<br>(0.61-0.97) | 0.96<br>(0.81-1.13) |
| IJsselland                    | 0.76<br>(0.50-1.14) | 1.19<br>(0.96-1.49) | 0.79<br>(0.54-1.16) | 1.06<br>(0.85-1.33) | 0.77<br>(0.56-1.07) | 1.03<br>(0.83-1.29) | 0.78<br>(0.55-1.09) | 1.08<br>(0.87-1.35) | 0.76<br>(0.55-1.04) | 1.05<br>(0.84-1.31) |
| Hollands Noorden              | 0.67<br>(0.52-0.86) | 1.16<br>(0.99-1.35) | 0.71<br>(0.56-0.90) | 1.07<br>(0.92-1.26) | 0.70<br>(0.56-0.87) | 1.04<br>(0.89-1.22) | 0.72<br>(0.57-0.91) | 1.04<br>(0.88-1.21) | 0.68<br>(0.54-0.86) | 1.04<br>(0.89-1.22) |
| Holland-Midden                | 0.62<br>(0.50-0.77) | 1.13<br>(0.98-1.30) | 0.68<br>(0.55-0.82) | 1.03<br>(0.89-1.19) | 0.68<br>(0.56-0.81) | 0.98<br>(0.85-1.14) | 0.69<br>(0.57-0.83) | 1.05<br>(0.91-1.22) | 0.64<br>(0.52-0.78) | 1.03<br>(0.89-1.20) |
| Hart voor Brabant             | 0.83<br>(0.58-1.17) | 1.39<br>(1.20-1.61) | 0.89<br>(0.65-1.23) | 1.24<br>(1.07-1.44) | 0.91<br>(0.67-1.25) | 1.23<br>(1.05-1.43) | 0.93<br>(0.68-1.29) | 1.21<br>(1.03-1.41) | 0.81<br>(0.61-1.07) | 1.24<br>(1.06-1.45) |
| Haaglanden                    | 0.75<br>(0.59-0.96) | 0.86<br>(0.74-1.00) | 0.77<br>(0.62-0.96) | 0.94<br>(0.81-1.09) | 0.82<br>(0.66-1.02) | 0.90<br>(0.78-1.05) | 0.78<br>(0.63-0.96) | 0.95<br>(0.81-1.10) | 0.77<br>(0.62-0.97) | 0.96<br>(0.82-1.12) |
| Groningen                     | 0.80<br>(0.63-1.03) | 0.99<br>(0.84-1.17) | 0.83<br>(0.66-1.03) | 1.09<br>(0.92-1.30) | 0.86<br>(0.68-1.08) | 1.04<br>(0.88-1.24) | 0.83<br>(0.67-1.03) | 1.11<br>(0.93-1.32) | 0.83<br>(0.66-1.05) | 0.99<br>(0.83-1.17) |
| Gooi en<br>Vechtstreek        | 0.70<br>(0.53-0.92) | 1.23<br>(1.01-1.50) | 0.74<br>(0.58-0.93) | 1.11<br>(0.91-1.35) | 0.74<br>(0.59-0.93) | 1.06<br>(0.87-1.30) | 0.77<br>(0.62-0.96) | 1.08<br>(0.88-1.33) | 0.70<br>(0.56-0.89) | 1.08<br>(0.87-1.32) |
| Gelderland-Zuid               | 0.94<br>(0.60-1.46) | 1.02<br>(0.87-1.19) | 0.96<br>(0.67-1.39) | 1.00<br>(0.86-1.17) | 0.96<br>(0.70-1.32) | 0.95<br>(0.81-1.11) | 0.95<br>(0.69-1.31) | 0.98<br>(0.83-1.15) | 0.93<br>(0.68-1.27) | 1.00<br>(0.85-1.18) |

|                       |                     |                     |                     |                     |                     |                     |                     |                     |                     |                     |
|-----------------------|---------------------|---------------------|---------------------|---------------------|---------------------|---------------------|---------------------|---------------------|---------------------|---------------------|
| Gelderland-<br>Midden | 1.04<br>(0.73-1.48) | 1.25<br>(1.02-1.52) | 1.17<br>(0.78-1.76) | 1.19<br>(0.97-1.45) | 1.16<br>(0.81-1.67) | 1.16<br>(0.94-1.42) | 1.14<br>(0.80-1.64) | 1.22<br>(0.99-1.49) | 1.15<br>(0.72-1.84) | 1.25<br>(1.01-1.55) |
| Friesland             | 0.74<br>(0.58-0.95) | 1.29<br>(1.09-1.52) | 0.78<br>(0.62-0.99) | 1.21<br>(1.02-1.43) | 0.79<br>(0.62-0.99) | 1.13<br>(0.96-1.34) | 0.77<br>(0.62-0.95) | 1.19<br>(1.00-1.41) | 0.76<br>(0.60-0.97) | 1.15<br>(0.97-1.37) |
| Flevoland             | 0.71<br>(0.48-1.04) | 1.42<br>(1.03-1.97) | 0.77<br>(0.54-1.09) | 1.40<br>(1.00-1.98) | 0.79<br>(0.57-1.10) | 1.37<br>(0.96-1.97) | 0.78<br>(0.56-1.10) | 1.45<br>(1.02-2.08) | 0.74<br>(0.53-1.03) | 1.46<br>(1.00-2.11) |
| Drenthe               | 0.95<br>(0.61-1.48) | 1.20<br>(0.94-1.52) | 0.93<br>(0.65-1.32) | 1.09<br>(0.86-1.39) | 0.93<br>(0.67-1.29) | 1.03<br>(0.80-1.31) | 0.94<br>(0.68-1.30) | 1.05<br>(0.82-1.34) | 0.90<br>(0.66-1.24) | 1.03<br>(0.81-1.32) |
| Brabant-Zuidoost      | 0.89<br>(0.71-1.11) | 1.44<br>(1.22-1.70) | 0.98<br>(0.78-1.23) | 1.28<br>(1.08-1.51) | 1.03<br>(0.82-1.29) | 1.31<br>(1.10-1.55) | 1.05<br>(0.84-1.31) | 1.24<br>(1.04-1.47) | 0.98<br>(0.78-1.22) | 1.32<br>(1.11-1.57) |
| Amsterdam             | 0.81<br>(0.64-1.02) | 0.71<br>(0.61-0.83) | 0.86<br>(0.70-1.07) | 0.86<br>(0.73-1.00) | 0.88<br>(0.72-1.08) | 0.77<br>(0.65-0.90) | 0.91<br>(0.74-1.11) | 0.80<br>(0.68-0.94) | 0.88<br>(0.71-1.09) | 0.78<br>(0.66-0.92) |

**Table A5 continued.**

| IRR (95% CI)                  | <u>Model 4</u>      |                     | <u>Model 5a</u>     |                     | <u>Model 5b</u>     |                     | <u>Model 5c</u>     |                     | <u>Model 6</u>      |                     |
|-------------------------------|---------------------|---------------------|---------------------|---------------------|---------------------|---------------------|---------------------|---------------------|---------------------|---------------------|
|                               |                     | Infl.               |                     | Infl.               |                     | Infl.               |                     | Infl.               |                     | Infl.               |
| Zuid-Limburg                  | 1.00 (ref)          | 1.00 (ref)          | 1.00 (ref)          | 1.00 (ref)          | 1.00 (ref)          | 1.00 (ref)          | 1.00 (ref)          | 1.00 (ref)          | 1.00 (ref)          | 1.00 (ref)          |
| Zuid-Holland-Zuid             | 0.54<br>(0.42-0.69) | 1.10<br>(0.88-1.38) | 0.53<br>(0.42-0.68) | 1.11<br>(0.88-1.39) | 0.54<br>(0.42-0.68) | 1.08<br>(0.86-1.36) | 0.54<br>(0.42-0.69) | 1.11<br>(0.88-1.40) | 0.53<br>(0.42-0.68) | 1.10<br>(0.88-1.39) |
| Zeeland                       | 0.86<br>(0.65-1.14) | 0.96<br>(0.79-1.18) | 0.86<br>(0.65-1.12) | 0.96<br>(0.78-1.18) | 0.85<br>(0.64-1.13) | 0.98<br>(0.80-1.21) | 0.85<br>(0.64-1.13) | 0.99<br>(0.80-1.22) | 0.85<br>(0.64-1.12) | 1.00<br>(0.81-1.24) |
| Zaanstreek-<br>Waterland      | 0.73<br>(0.59-0.90) | 1.04<br>(0.88-1.23) | 0.72<br>(0.58-0.88) | 1.05<br>(0.89-1.24) | 0.74<br>(0.59-0.91) | 1.01<br>(0.85-1.19) | 0.73<br>(0.59-0.90) | 1.03<br>(0.87-1.22) | 0.73<br>(0.59-0.90) | 1.02<br>(0.86-1.21) |
| West-Brabant                  | 1.09<br>(0.84-1.43) | 1.20<br>(0.99-1.44) | 1.11<br>(0.85-1.45) | 1.19<br>(0.99-1.44) | 1.07<br>(0.83-1.39) | 1.19<br>(0.99-1.43) | 1.10<br>(0.84-1.44) | 1.19<br>(0.99-1.43) | 1.10<br>(0.85-1.43) | 1.19<br>(0.99-1.43) |
| Utrecht                       | 0.85<br>(0.71-1.02) | 0.87<br>(0.76-0.99) | 0.85<br>(0.71-1.01) | 0.88<br>(0.77-1.00) | 0.86<br>(0.72-1.03) | 0.85<br>(0.74-0.97) | 0.86<br>(0.72-1.03) | 0.86<br>(0.75-0.98) | 0.86<br>(0.72-1.03) | 0.85<br>(0.75-0.98) |
| Twente                        | 0.72<br>(0.57-0.92) | 1.19<br>(0.96-1.48) | 0.73<br>(0.57-0.93) | 1.20<br>(0.97-1.48) | 0.73<br>(0.57-0.93) | 1.15<br>(0.93-1.43) | 0.72<br>(0.57-0.92) | 1.17<br>(0.94-1.45) | 0.73<br>(0.57-0.94) | 1.16<br>(0.93-1.43) |
| Rotterdam-<br>Rijnmond        | 0.93<br>(0.74-1.17) | 1.20<br>(1.04-1.38) | 0.93<br>(0.74-1.16) | 1.20<br>(1.04-1.39) | 0.93<br>(0.75-1.17) | 1.17<br>(1.01-1.35) | 0.94<br>(0.75-1.18) | 1.17<br>(1.02-1.36) | 0.93<br>(0.75-1.16) | 1.16<br>(1.01-1.34) |
| Noord- en Oost-<br>Gelderland | 0.94<br>(0.73-1.22) | 1.25<br>(1.05-1.48) | 0.95<br>(0.73-1.24) | 1.25<br>(1.06-1.48) | 0.96<br>(0.74-1.26) | 1.22<br>(1.03-1.45) | 0.96<br>(0.74-1.25) | 1.25<br>(1.05-1.48) | 0.97<br>(0.74-1.28) | 1.24<br>(1.05-1.47) |
| Limburg-Noord                 | 1.06<br>(0.75-1.50) | 1.16<br>(0.98-1.36) | 1.06<br>(0.75-1.49) | 1.16<br>(0.98-1.36) | 1.06<br>(0.75-1.48) | 1.16<br>(0.98-1.36) | 1.06<br>(0.76-1.47) | 1.15<br>(0.98-1.35) | 1.05<br>(0.76-1.46) | 1.16<br>(0.98-1.37) |
| Kennemerland                  | 0.79<br>(0.63-0.98) | 0.91<br>(0.77-1.08) | 0.78<br>(0.63-0.96) | 0.92<br>(0.78-1.09) | 0.80<br>(0.64-1.00) | 0.89<br>(0.75-1.05) | 0.79<br>(0.64-0.98) | 0.89<br>(0.75-1.05) | 0.79<br>(0.64-0.97) | 0.89<br>(0.75-1.05) |
| IJsselland                    | 0.76<br>(0.57-1.02) | 1.04<br>(0.84-1.30) | 0.74<br>(0.57-0.97) | 1.06<br>(0.85-1.32) | 0.78<br>(0.58-1.05) | 1.01<br>(0.81-1.26) | 0.76<br>(0.56-1.02) | 1.06<br>(0.85-1.33) | 0.76<br>(0.58-0.99) | 1.05<br>(0.84-1.32) |
| Hollands Noorden              | 0.69<br>(0.56-0.86) | 1.01<br>(0.86-1.19) | 0.69<br>(0.55-0.85) | 1.02<br>(0.87-1.20) | 0.70<br>(0.56-0.86) | 0.99<br>(0.84-1.16) | 0.70<br>(0.57-0.88) | 1.00<br>(0.85-1.17) | 0.70<br>(0.56-0.87) | 0.99<br>(0.84-1.17) |
| Holland-Midden                | 0.65<br>(0.54-0.79) | 1.02<br>(0.88-1.19) | 0.65<br>(0.54-0.79) | 1.02<br>(0.88-1.19) | 0.66<br>(0.55-0.80) | 1.00<br>(0.86-1.16) | 0.66<br>(0.55-0.80) | 1.05<br>(0.90-1.22) | 0.66<br>(0.55-0.80) | 1.03<br>(0.89-1.20) |
| Hart voor Brabant             | 0.87<br>(0.65-1.15) | 1.19<br>(1.02-1.39) | 0.86<br>(0.65-1.13) | 1.19<br>(1.02-1.40) | 0.88<br>(0.65-1.19) | 1.17<br>(1.00-1.37) | 0.84<br>(0.64-1.11) | 1.18<br>(1.00-1.38) | 0.86<br>(0.65-1.13) | 1.17<br>(1.00-1.38) |
| Haaglanden                    | 0.80<br>(0.64-0.99) | 0.94<br>(0.80-1.10) | 0.79<br>(0.64-0.98) | 0.94<br>(0.80-1.11) | 0.79<br>(0.64-0.98) | 0.93<br>(0.79-1.09) | 0.79<br>(0.64-0.98) | 0.93<br>(0.79-1.09) | 0.78<br>(0.63-0.97) | 0.93<br>(0.79-1.09) |
| Groningen                     | 0.85<br>(0.68-1.07) | 0.98<br>(0.83-1.17) | 0.85<br>(0.68-1.07) | 0.99<br>(0.83-1.18) | 0.85<br>(0.68-1.06) | 0.95<br>(0.80-1.13) | 0.86<br>(0.69-1.07) | 0.96<br>(0.80-1.14) | 0.85<br>(0.68-1.07) | 0.95<br>(0.80-1.13) |
| Gooi en<br>Vechtstreek        | 0.74<br>(0.60-0.91) | 1.05<br>(0.85-1.29) | 0.74<br>(0.60-0.92) | 1.05<br>(0.85-1.30) | 0.74<br>(0.60-0.91) | 1.01<br>(0.81-1.24) | 0.75<br>(0.60-0.93) | 1.03<br>(0.83-1.28) | 0.75<br>(0.60-0.92) | 1.01<br>(0.81-1.25) |
| Gelderland-Zuid               | 0.94<br>(0.71-1.25) | 0.96<br>(0.81-1.13) | 0.91<br>(0.72-1.16) | 0.96<br>(0.81-1.14) | 0.93<br>(0.71-1.22) | 0.93<br>(0.79-1.10) | 0.95<br>(0.71-1.27) | 0.96<br>(0.81-1.13) | 0.91<br>(0.72-1.15) | 0.95<br>(0.80-1.12) |

|                       |                     |                     |                     |                     |                     |                     |                     |                     |                     |                     |
|-----------------------|---------------------|---------------------|---------------------|---------------------|---------------------|---------------------|---------------------|---------------------|---------------------|---------------------|
| Gelderland-<br>Midden | 1.13<br>(0.76-1.70) | 1.23<br>(1.00-1.53) | 1.14<br>(0.75-1.73) | 1.25<br>(1.01-1.55) | 1.16<br>(0.76-1.77) | 1.22<br>(0.98-1.52) | 1.14<br>(0.75-1.74) | 1.24<br>(1.00-1.54) | 1.17<br>(0.75-1.81) | 1.25<br>(1.00-1.55) |
| Friesland             | 0.76<br>(0.61-0.95) | 1.11<br>(0.93-1.32) | 0.77<br>(0.62-0.97) | 1.12<br>(0.94-1.33) | 0.76<br>(0.61-0.95) | 1.09<br>(0.92-1.30) | 0.76<br>(0.61-0.96) | 1.09<br>(0.92-1.30) | 0.77<br>(0.62-0.96) | 1.09<br>(0.92-1.30) |
| Flevoland             | 0.78<br>(0.55-1.09) | 1.48<br>(1.01-2.19) | 0.78<br>(0.55-1.11) | 1.48<br>(1.00-2.18) | 0.78<br>(0.55-1.09) | 1.47<br>(0.99-2.17) | 0.79<br>(0.55-1.13) | 1.45<br>(0.99-2.12) | 0.79<br>(0.55-1.13) | 1.44<br>(0.98-2.12) |
| Drenthe               | 0.93<br>(0.69-1.25) | 0.98<br>(0.77-1.25) | 0.91<br>(0.67-1.24) | 0.99<br>(0.77-1.26) | 0.93<br>(0.68-1.26) | 0.96<br>(0.75-1.23) | 0.94<br>(0.69-1.26) | 0.95<br>(0.74-1.22) | 0.92<br>(0.67-1.26) | 0.95<br>(0.75-1.22) |
| Brabant-Zuidoost      | 1.04<br>(0.83-1.29) | 1.28<br>(1.07-1.52) | 1.05<br>(0.84-1.31) | 1.28<br>(1.07-1.52) | 1.05<br>(0.84-1.31) | 1.27<br>(1.06-1.52) | 1.05<br>(0.85-1.31) | 1.29<br>(1.08-1.54) | 1.07<br>(0.86-1.33) | 1.30<br>(1.08-1.55) |
| Amsterdam             | 0.91<br>(0.75-1.12) | 0.71<br>(0.60-0.85) | 0.90<br>(0.74-1.10) | 0.73<br>(0.62-0.86) | 0.93<br>(0.76-1.14) | 0.69<br>(0.58-0.81) | 0.92<br>(0.76-1.13) | 0.69<br>(0.59-0.82) | 0.92<br>(0.75-1.12) | 0.70<br>(0.59-0.83) |

IRR: Incidence Rate Ratio. CI: confidence interval. Model 1: region. Model 2: region, demographic factors, and SES. Model 3a: region, demographic factors, SES, and self-rated health. Model 3b: region, demographic factors, SES and chronic disease. Model 3c: region, demographic factors, SES and psychological distress. Model 4: region, demographic factors, SES, self-rated health, chronic disease, and psychological distress. Model 5a: region, demographic factors, SES, self-rated health, chronic disease, psychological distress, and lifestyle. Model 5b: region, demographic factors, SES, self-rated health, chronic disease, psychological distress, and loneliness. Model 5c: region, demographic factors, SES, self-rated health, chronic disease, psychological distress, and mastery. Model 6: region, demographic factors, SES, self-rated health, chronic disease, psychological distress, lifestyle, loneliness, and mastery. Registry data: age, gender, migration background and household income. Self-reported data: marital status, education, income inadequacy, self-rated health, chronic disease, psychological distress, lifestyle, loneliness, and mastery.

**Table A6. Incidence Rate Ratios per region for pharmaceutical costs compared to Zuid-Limburg. Results from Zero-inflated negative binomial regressions (n= 334,721).**

| IRR (95% CI)                  | Model 1             |                     | Model 2             |                     | Model 3a            |                     | Model 3b            |                     | Model 3c            |                     |
|-------------------------------|---------------------|---------------------|---------------------|---------------------|---------------------|---------------------|---------------------|---------------------|---------------------|---------------------|
|                               |                     | Infl.               |                     | Infl.               |                     | Infl.               |                     | Infl.               |                     | Infl.               |
| Zuid-Limburg                  | 1.00 (ref)          | 1.00 (ref)          | 1.00 (ref)          | 1.00 (ref)          | 1.00 (ref)          | 1.00 (ref)          | 1.00 (ref)          | 1.00 (ref)          | 1.00 (ref)          | 1.00 (ref)          |
| Zuid-Holland-<br>Zuid         | 1.12<br>(0.84-1.50) | 1.23<br>(1.08-1.40) | 1.17<br>(0.90-1.51) | 1.19<br>(1.04-1.35) | 1.18<br>(0.98-1.42) | 1.12<br>(0.99-1.26) | 1.19<br>(1.02-1.38) | 1.11<br>(0.99-1.24) | 1.20<br>(1.04-1.38) | 1.09<br>(0.97-1.22) |
| Zeeland                       | 1.05<br>(0.87-1.28) | 1.09<br>(0.97-1.24) | 1.11<br>(0.88-1.40) | 1.17<br>(1.03-1.33) | 1.15<br>(0.87-1.51) | 1.16<br>(1.03-1.31) | 1.31<br>(0.95-1.80) | 1.13<br>(1.00-1.26) | 1.30<br>(0.93-1.83) | 1.13<br>(1.01-1.27) |
| Zaanstreek-<br>Waterland      | 0.98<br>(0.87-1.11) | 1.30<br>(1.18-1.44) | 1.17<br>(0.97-1.40) | 1.33<br>(1.20-1.48) | 1.29<br>(1.03-1.63) | 1.29<br>(1.16-1.42) | 1.17<br>(0.95-1.44) | 1.32<br>(1.20-1.45) | 1.22<br>(0.98-1.51) | 1.30<br>(1.18-1.43) |
| West-Brabant                  | 1.03<br>(0.90-1.17) | 1.16<br>(1.04-1.29) | 1.21<br>(0.99-1.48) | 1.15<br>(1.03-1.29) | 1.20<br>(0.97-1.48) | 1.14<br>(1.03-1.27) | 1.20<br>(1.07-1.33) | 1.07<br>(0.96-1.18) | 1.18<br>(1.05-1.34) | 1.08<br>(0.98-1.19) |
| Utrecht                       | 0.88<br>(0.79-0.98) | 1.63<br>(1.50-1.77) | 1.00<br>(0.89-1.11) | 1.38<br>(1.27-1.50) | 1.04<br>(0.94-1.16) | 1.33<br>(1.23-1.44) | 1.04<br>(0.96-1.13) | 1.33<br>(1.23-1.44) | 1.06<br>(0.97-1.15) | 1.32<br>(1.22-1.42) |
| Twente                        | 0.83<br>(0.75-0.93) | 1.35<br>(1.21-1.50) | 0.88<br>(0.78-1.00) | 1.26<br>(1.12-1.41) | 0.95<br>(0.86-1.06) | 1.22<br>(1.10-1.35) | 0.96<br>(0.88-1.04) | 1.25<br>(1.13-1.39) | 0.98<br>(0.90-1.06) | 1.24<br>(1.12-1.38) |
| Rotterdam-<br>Rijnmond        | 1.10<br>(0.99-1.23) | 1.23<br>(1.12-1.34) | 1.23<br>(1.08-1.41) | 1.19<br>(1.09-1.30) | 1.27<br>(1.12-1.44) | 1.15<br>(1.06-1.25) | 1.18<br>(1.07-1.30) | 1.16<br>(1.07-1.26) | 1.20<br>(1.09-1.32) | 1.15<br>(1.06-1.25) |
| Noord- en Oost-<br>Gelderland | 0.95<br>(0.84-1.06) | 1.35<br>(1.23-1.49) | 1.05<br>(0.92-1.19) | 1.37<br>(1.24-1.51) | 1.15<br>(1.00-1.32) | 1.32<br>(1.20-1.44) | 1.10<br>(0.94-1.29) | 1.39<br>(1.27-1.52) | 1.13<br>(0.97-1.32) | 1.37<br>(1.25-1.50) |
| Limburg-Noord                 | 0.94<br>(0.86-1.02) | 1.06<br>(0.95-1.17) | 0.92<br>(0.83-1.01) | 1.09<br>(0.98-1.21) | 0.95<br>(0.86-1.05) | 1.07<br>(0.97-1.18) | 0.98<br>(0.91-1.05) | 1.08<br>(0.98-1.18) | 0.98<br>(0.91-1.06) | 1.07<br>(0.97-1.17) |
| Kennemerland                  | 0.85<br>(0.76-0.94) | 1.49<br>(1.35-1.65) | 0.93<br>(0.82-1.06) | 1.44<br>(1.30-1.59) | 1.02<br>(0.89-1.17) | 1.38<br>(1.25-1.51) | 1.05<br>(0.91-1.21) | 1.38<br>(1.26-1.52) | 1.08<br>(0.94-1.24) | 1.37<br>(1.25-1.50) |
| IJsselland                    | 0.88<br>(0.75-1.04) | 1.56<br>(1.39-1.75) | 1.03<br>(0.81-1.29) | 1.39<br>(1.23-1.57) | 1.03<br>(0.89-1.19) | 1.35<br>(1.21-1.51) | 1.00<br>(0.87-1.14) | 1.42<br>(1.27-1.58) | 1.00<br>(0.89-1.12) | 1.40<br>(1.26-1.56) |
| Hollands Noorden              | 1.02<br>(0.88-1.19) | 1.70<br>(1.55-1.87) | 1.22<br>(0.98-1.53) | 1.74<br>(1.58-1.92) | 1.14<br>(0.94-1.39) | 1.65<br>(1.51-1.81) | 1.19<br>(0.92-1.54) | 1.64<br>(1.50-1.80) | 1.11<br>(0.94-1.32) | 1.62<br>(1.48-1.77) |
| Holland-Midden                | 0.99<br>(0.82-1.19) | 1.45<br>(1.32-1.59) | 1.05<br>(0.89-1.24) | 1.32<br>(1.21-1.45) | 1.06<br>(0.94-1.21) | 1.27<br>(1.16-1.38) | 0.98<br>(0.89-1.09) | 1.34<br>(1.23-1.46) | 0.99<br>(0.91-1.09) | 1.32<br>(1.22-1.44) |
| Hart voor Brabant             | 0.97<br>(0.84-1.12) | 1.34<br>(1.22-1.47) | 1.06<br>(0.89-1.25) | 1.28<br>(1.16-1.40) | 1.03<br>(0.90-1.18) | 1.26<br>(1.15-1.37) | 1.08<br>(0.97-1.19) | 1.22<br>(1.12-1.33) | 1.06<br>(0.96-1.16) | 1.22<br>(1.12-1.33) |
| Haaglanden                    | 0.95<br>(0.85-1.06) | 1.26<br>(1.13-1.39) | 1.06<br>(0.93-1.21) | 1.16<br>(1.04-1.28) | 1.13<br>(0.99-1.28) | 1.13<br>(1.02-1.24) | 1.01<br>(0.93-1.10) | 1.16<br>(1.06-1.28) | 1.04<br>(0.96-1.13) | 1.16<br>(1.05-1.27) |
| Groningen                     | 0.91<br>(0.82-1.00) | 1.53<br>(1.38-1.70) | 1.00<br>(0.86-1.16) | 1.37<br>(1.23-1.52) | 1.05<br>(0.93-1.18) | 1.32<br>(1.20-1.46) | 0.98<br>(0.89-1.08) | 1.39<br>(1.26-1.53) | 1.00<br>(0.92-1.10) | 1.38<br>(1.25-1.52) |
| Gooi en<br>Vechtstreek        | 1.20<br>(0.81-1.76) | 1.45<br>(1.26-1.66) | 1.41<br>(0.81-2.47) | 1.46<br>(1.27-1.67) | 1.19<br>(0.88-1.63) | 1.36<br>(1.20-1.53) | 1.17<br>(0.84-1.62) | 1.32<br>(1.17-1.49) | 1.12<br>(0.86-1.45) | 1.30<br>(1.15-1.47) |
| Gelderland-Zuid               | 0.99<br>(0.88-1.11) | 1.53<br>(1.39-1.69) | 1.11<br>(0.96-1.28) | 1.38<br>(1.25-1.53) | 1.14<br>(1.00-1.30) | 1.33<br>(1.20-1.46) | 1.07<br>(0.97-1.18) | 1.33<br>(1.21-1.46) | 1.09<br>(0.99-1.20) | 1.32<br>(1.20-1.45) |

|                       |                     |                     |                     |                     |                     |                     |                     |                     |                     |                     |
|-----------------------|---------------------|---------------------|---------------------|---------------------|---------------------|---------------------|---------------------|---------------------|---------------------|---------------------|
| Gelderland-<br>Midden | 0.97<br>(0.84-1.11) | 1.51<br>(1.34-1.70) | 0.98<br>(0.87-1.12) | 1.39<br>(1.23-1.57) | 1.04<br>(0.91-1.19) | 1.34<br>(1.19-1.50) | 0.97<br>(0.89-1.06) | 1.40<br>(1.25-1.57) | 0.98<br>(0.89-1.08) | 1.38<br>(1.24-1.55) |
| Friesland             | 1.00<br>(0.86-1.17) | 1.38<br>(1.25-1.53) | 1.05<br>(0.88-1.25) | 1.41<br>(1.27-1.56) | 1.10<br>(0.95-1.27) | 1.34<br>(1.21-1.47) | 1.03<br>(0.92-1.15) | 1.35<br>(1.23-1.48) | 1.05<br>(0.94-1.17) | 1.33<br>(1.21-1.46) |
| Flevoland             | 0.97<br>(0.77-1.23) | 1.31<br>(1.05-1.64) | 1.14<br>(0.86-1.51) | 1.16<br>(0.92-1.47) | 1.20<br>(0.85-1.68) | 1.14<br>(0.92-1.41) | 1.07<br>(0.89-1.27) | 1.18<br>(0.95-1.45) | 1.08<br>(0.89-1.32) | 1.17<br>(0.95-1.43) |
| Drenthe               | 0.90<br>(0.75-1.08) | 1.21<br>(1.05-1.39) | 0.97<br>(0.76-1.23) | 1.27<br>(1.09-1.47) | 1.03<br>(0.87-1.22) | 1.21<br>(1.05-1.39) | 1.00<br>(0.87-1.15) | 1.23<br>(1.08-1.40) | 1.03<br>(0.91-1.17) | 1.21<br>(1.06-1.38) |
| Brabant-Zuidoost      | 0.90<br>(0.82-0.98) | 1.34<br>(1.21-1.47) | 0.95<br>(0.85-1.07) | 1.28<br>(1.16-1.41) | 0.99<br>(0.87-1.12) | 1.29<br>(1.17-1.41) | 1.02<br>(0.94-1.12) | 1.21<br>(1.11-1.33) | 1.03<br>(0.92-1.14) | 1.24<br>(1.13-1.35) |
| Amsterdam             | 1.26<br>(1.07-1.48) | 1.78<br>(1.60-1.97) | 1.33<br>(1.12-1.59) | 1.44<br>(1.29-1.60) | 1.46<br>(1.21-1.76) | 1.35<br>(1.22-1.50) | 1.24<br>(1.07-1.44) | 1.34<br>(1.22-1.48) | 1.30<br>(1.12-1.51) | 1.32<br>(1.20-1.46) |

**Table A6 continued.**

| IRR (95%CI)                   | <u>Model 4</u>      |                     | <u>Model 5a</u>     |                     | <u>Model 5b</u>     |                     | <u>Model 5c</u>     |                     | <u>Model 6</u>      |                     |
|-------------------------------|---------------------|---------------------|---------------------|---------------------|---------------------|---------------------|---------------------|---------------------|---------------------|---------------------|
|                               |                     | Infl.               |                     | Infl.               |                     | Infl.               |                     | Infl.               |                     | Infl.               |
| Zuid-Limburg                  | 1.00 (ref)          | 1.00 (ref)          | 1.00 (ref)          | 1.00 (ref)          | 1.00 (ref)          | 1.00 (ref)          | 1.00 (ref)          | 1.00 (ref)          | 1.00 (ref)          | 1.00 (ref)          |
| Zuid-Holland-Zuid             | 1.20<br>(1.04-1.38) | 1.09<br>(0.97-1.22) | 1.20<br>(1.04-1.38) | 1.09<br>(0.97-1.23) | 1.20<br>(1.04-1.38) | 1.09<br>(0.97-1.23) | 1.19<br>(1.04-1.35) | 1.09<br>(0.97-1.22) | 1.19<br>(1.04-1.36) | 1.10<br>(0.98-1.23) |
| Zeeland                       | 1.30<br>(0.93-1.83) | 1.13<br>(1.01-1.27) | 1.32<br>(0.94-1.85) | 1.12<br>(1.00-1.26) | 1.30<br>(0.93-1.82) | 1.13<br>(1.01-1.27) | 1.29<br>(0.92-1.81) | 1.13<br>(1.01-1.27) | 1.31<br>(0.93-1.84) | 1.12<br>(1.00-1.26) |
| Zaanstreek-<br>Waterland      | 1.22<br>(0.98-1.51) | 1.30<br>(1.18-1.43) | 1.22<br>(0.99-1.51) | 1.30<br>(1.18-1.43) | 1.22<br>(0.98-1.51) | 1.31<br>(1.19-1.44) | 1.22<br>(0.98-1.53) | 1.30<br>(1.18-1.43) | 1.22<br>(0.98-1.51) | 1.31<br>(1.19-1.44) |
| West-Brabant                  | 1.18<br>(1.05-1.34) | 1.08<br>(0.98-1.19) | 1.20<br>(1.06-1.35) | 1.08<br>(0.97-1.19) | 1.18<br>(1.05-1.34) | 1.08<br>(0.98-1.19) | 1.18<br>(1.04-1.33) | 1.08<br>(0.98-1.19) | 1.19<br>(1.05-1.34) | 1.08<br>(0.98-1.19) |
| Utrecht                       | 1.06<br>(0.97-1.15) | 1.32<br>(1.22-1.42) | 1.07<br>(0.98-1.16) | 1.31<br>(1.21-1.41) | 1.06<br>(0.97-1.15) | 1.32<br>(1.23-1.43) | 1.05<br>(0.97-1.14) | 1.32<br>(1.22-1.42) | 1.06<br>(0.97-1.15) | 1.32<br>(1.22-1.42) |
| Twente                        | 0.98<br>(0.90-1.06) | 1.24<br>(1.12-1.38) | 0.99<br>(0.91-1.07) | 1.25<br>(1.13-1.38) | 0.98<br>(0.90-1.06) | 1.25<br>(1.13-1.39) | 0.98<br>(0.90-1.06) | 1.24<br>(1.12-1.38) | 0.98<br>(0.91-1.06) | 1.26<br>(1.13-1.39) |
| Rotterdam-<br>Rijnmond        | 1.20<br>(1.09-1.32) | 1.15<br>(1.06-1.25) | 1.21<br>(1.09-1.33) | 1.16<br>(1.07-1.26) | 1.20<br>(1.09-1.32) | 1.16<br>(1.06-1.25) | 1.20<br>(1.09-1.32) | 1.15<br>(1.06-1.25) | 1.20<br>(1.09-1.32) | 1.16<br>(1.07-1.26) |
| Noord- en Oost-<br>Gelderland | 1.13<br>(0.97-1.32) | 1.37<br>(1.25-1.50) | 1.14<br>(0.98-1.33) | 1.38<br>(1.26-1.51) | 1.13<br>(0.97-1.32) | 1.38<br>(1.26-1.51) | 1.13<br>(0.97-1.31) | 1.37<br>(1.25-1.50) | 1.13<br>(0.97-1.31) | 1.39<br>(1.27-1.51) |
| Limburg-Noord                 | 0.98<br>(0.91-1.06) | 1.07<br>(0.97-1.17) | 0.99<br>(0.92-1.07) | 1.07<br>(0.97-1.17) | 0.98<br>(0.91-1.06) | 1.07<br>(0.97-1.17) | 0.98<br>(0.91-1.06) | 1.07<br>(0.97-1.17) | 0.99<br>(0.91-1.07) | 1.06<br>(0.97-1.17) |
| Kennemerland                  | 1.08<br>(0.94-1.24) | 1.37<br>(1.25-1.50) | 1.09<br>(0.95-1.25) | 1.37<br>(1.24-1.50) | 1.08<br>(0.94-1.24) | 1.37<br>(1.25-1.51) | 1.08<br>(0.94-1.23) | 1.37<br>(1.25-1.50) | 1.08<br>(0.95-1.24) | 1.37<br>(1.25-1.51) |
| IJsselland                    | 1.00<br>(0.89-1.12) | 1.40<br>(1.26-1.56) | 1.01<br>(0.90-1.14) | 1.41<br>(1.26-1.57) | 1.00<br>(0.89-1.12) | 1.41<br>(1.26-1.57) | 0.99<br>(0.88-1.12) | 1.40<br>(1.25-1.56) | 1.01<br>(0.89-1.13) | 1.42<br>(1.27-1.59) |
| Hollands Noorden              | 1.11<br>(0.94-1.32) | 1.62<br>(1.48-1.77) | 1.12<br>(0.94-1.34) | 1.62<br>(1.48-1.77) | 1.11<br>(0.94-1.32) | 1.63<br>(1.49-1.78) | 1.11<br>(0.94-1.33) | 1.62<br>(1.48-1.77) | 1.12<br>(0.94-1.34) | 1.63<br>(1.49-1.78) |
| Holland-Midden                | 0.99<br>(0.91-1.09) | 1.32<br>(1.22-1.44) | 1.00<br>(0.92-1.10) | 1.33<br>(1.22-1.44) | 0.99<br>(0.91-1.09) | 1.33<br>(1.22-1.44) | 0.98<br>(0.90-1.07) | 1.32<br>(1.21-1.44) | 0.99<br>(0.90-1.08) | 1.33<br>(1.23-1.45) |
| Hart voor Brabant             | 1.06<br>(0.96-1.16) | 1.22<br>(1.12-1.33) | 1.07<br>(0.97-1.17) | 1.22<br>(1.12-1.32) | 1.06<br>(0.96-1.16) | 1.23<br>(1.13-1.34) | 1.05<br>(0.96-1.16) | 1.22<br>(1.12-1.33) | 1.06<br>(0.97-1.17) | 1.22<br>(1.12-1.33) |
| Haaglanden                    | 1.04<br>(0.96-1.13) | 1.16<br>(1.05-1.27) | 1.05<br>(0.96-1.14) | 1.15<br>(1.05-1.27) | 1.04<br>(0.96-1.13) | 1.16<br>(1.05-1.28) | 1.04<br>(0.96-1.14) | 1.16<br>(1.05-1.27) | 1.05<br>(0.96-1.14) | 1.16<br>(1.05-1.27) |
| Groningen                     | 1.00<br>(0.92-1.10) | 1.38<br>(1.25-1.52) | 1.00<br>(0.92-1.10) | 1.39<br>(1.26-1.53) | 1.00<br>(0.92-1.10) | 1.38<br>(1.25-1.52) | 1.00<br>(0.91-1.10) | 1.38<br>(1.25-1.52) | 1.00<br>(0.91-1.09) | 1.39<br>(1.26-1.53) |
| Gooi en<br>Vechtstreek        | 1.12<br>(0.86-1.45) | 1.30<br>(1.15-1.47) | 1.14<br>(0.88-1.47) | 1.28<br>(1.13-1.44) | 1.12<br>(0.87-1.45) | 1.31<br>(1.16-1.48) | 1.14<br>(0.86-1.50) | 1.30<br>(1.15-1.47) | 1.15<br>(0.88-1.50) | 1.29<br>(1.14-1.46) |
| Gelderland-Zuid               | 1.09<br>(0.99-1.20) | 1.32<br>(1.20-1.45) | 1.10<br>(0.99-1.21) | 1.31<br>(1.19-1.44) | 1.09<br>(0.99-1.20) | 1.33<br>(1.21-1.46) | 1.08<br>(0.98-1.19) | 1.32<br>(1.20-1.45) | 1.09<br>(0.99-1.20) | 1.32<br>(1.20-1.45) |

|                       |                     |                     |                     |                     |                     |                     |                     |                     |                     |                     |
|-----------------------|---------------------|---------------------|---------------------|---------------------|---------------------|---------------------|---------------------|---------------------|---------------------|---------------------|
| Gelderland-<br>Midden | 0.98<br>(0.89-1.08) | 1.38<br>(1.24-1.55) | 0.99<br>(0.90-1.09) | 1.39<br>(1.24-1.56) | 0.98<br>(0.89-1.08) | 1.39<br>(1.24-1.56) | 0.98<br>(0.89-1.07) | 1.38<br>(1.23-1.55) | 0.98<br>(0.89-1.08) | 1.39<br>(1.24-1.56) |
| Friesland             | 1.05<br>(0.94-1.17) | 1.33<br>(1.21-1.46) | 1.06<br>(0.95-1.18) | 1.33<br>(1.21-1.46) | 1.05<br>(0.94-1.17) | 1.33<br>(1.21-1.47) | 1.05<br>(0.94-1.17) | 1.33<br>(1.21-1.46) | 1.06<br>(0.94-1.18) | 1.33<br>(1.21-1.47) |
| Flevoland             | 1.08<br>(0.89-1.32) | 1.17<br>(0.95-1.43) | 1.09<br>(0.89-1.33) | 1.17<br>(0.95-1.44) | 1.08<br>(0.89-1.32) | 1.17<br>(0.95-1.44) | 1.08<br>(0.89-1.31) | 1.17<br>(0.95-1.43) | 1.08<br>(0.89-1.32) | 1.18<br>(0.95-1.45) |
| Drenthe               | 1.03<br>(0.91-1.17) | 1.21<br>(1.06-1.38) | 1.04<br>(0.91-1.18) | 1.23<br>(1.08-1.40) | 1.03<br>(0.91-1.17) | 1.22<br>(1.07-1.39) | 1.03<br>(0.91-1.17) | 1.21<br>(1.06-1.38) | 1.03<br>(0.91-1.17) | 1.23<br>(1.08-1.41) |
| Brabant-Zuidoost      | 1.03<br>(0.92-1.14) | 1.24<br>(1.13-1.35) | 1.04<br>(0.94-1.16) | 1.22<br>(1.12-1.34) | 1.03<br>(0.93-1.14) | 1.24<br>(1.13-1.35) | 1.02<br>(0.92-1.14) | 1.23<br>(1.13-1.35) | 1.04<br>(0.93-1.16) | 1.23<br>(1.12-1.34) |
| Amsterdam             | 1.30<br>(1.12-1.51) | 1.32<br>(1.20-1.46) | 1.32<br>(1.13-1.53) | 1.33<br>(1.21-1.47) | 1.30<br>(1.12-1.51) | 1.33<br>(1.20-1.47) | 1.30<br>(1.12-1.50) | 1.32<br>(1.20-1.46) | 1.31<br>(1.13-1.53) | 1.34<br>(1.21-1.48) |

IRR: Incidence Rate Ratio. CI: confidence interval. Model 1: region. Model 2: region, demographic factors, and SES. Model 3a: region, demographic factors, SES, and self-rated health. Model 3b: region, demographic factors, SES and chronic disease. Model 3c: region, demographic factors, SES and psychological distress. Model 4: region, demographic factors, SES, self-rated health, chronic disease, and psychological distress. Model 5a: region, demographic factors, SES, self-rated health, chronic disease, psychological distress, and lifestyle. Model 5b: region, demographic factors, SES, self-rated health, chronic disease, psychological distress, and loneliness. Model 5c: region, demographic factors, SES, self-rated health, chronic disease, psychological distress, and mastery. Model 6: region, demographic factors, SES, self-rated health, chronic disease, psychological distress, lifestyle, loneliness, and mastery. Registry data: age, gender, migration background and household income. Self-reported data: marital status, education, income inadequacy, self-rated health, chronic disease, psychological distress, lifestyle, loneliness, and mastery.



**Table A7. Incidence Rate Ratios per region for specialized care costs compared to Zuid-Limburg. Results from Zero-inflated negative binomial regressions (n= 334,721).**

| IRR (95% CI)                  | <u>Model 1</u>      |                     | <u>Model 2</u>      |                     | <u>Model 3a</u>     |                     | <u>Model 3b</u>     |                     | <u>Model 3c</u>     |                     |
|-------------------------------|---------------------|---------------------|---------------------|---------------------|---------------------|---------------------|---------------------|---------------------|---------------------|---------------------|
|                               |                     | Infl.               |                     | Infl.               |                     | Infl.               |                     | Infl.               |                     | Infl.               |
| Zuid-Limburg                  | 1.00 (ref)          | 1.00 (ref)          | 1.00 (ref)          | 1.00 (ref)          | 1.00 (ref)          | 1.00 (ref)          | 1.00 (ref)          | 1.00 (ref)          | 1.00 (ref)          | 1.00 (ref)          |
| Zuid-Holland-Zuid             | 0.83<br>(0.75-0.91) | 1.15<br>(1.04-1.26) | 0.83<br>(0.75-0.91) | 1.12<br>(1.01-1.23) | 0.92<br>(0.84-1.00) | 1.07<br>(0.96-1.18) | 0.91<br>(0.84-1.00) | 1.07<br>(0.97-1.18) | 0.84<br>(0.76-0.93) | 1.11<br>(1.00-1.22) |
| Zeeland                       | 0.88<br>(0.80-0.97) | 1.01<br>(0.92-1.10) | 0.87<br>(0.79-0.96) | 1.09<br>(0.98-1.20) | 0.92<br>(0.83-1.01) | 1.08<br>(0.98-1.20) | 0.95<br>(0.86-1.04) | 1.04<br>(0.94-1.15) | 0.88<br>(0.80-0.97) | 1.09<br>(0.98-1.20) |
| Zaanstreek-<br>Waterland      | 0.97<br>(0.88-1.07) | 1.08<br>(1.00-1.17) | 1.00<br>(0.91-1.10) | 1.08<br>(0.99-1.18) | 1.03<br>(0.95-1.12) | 1.04<br>(0.96-1.13) | 1.02<br>(0.94-1.10) | 1.08<br>(0.99-1.17) | 1.00<br>(0.91-1.10) | 1.08<br>(0.99-1.17) |
| West-Brabant                  | 0.88<br>(0.81-0.97) | 1.02<br>(0.94-1.11) | 0.92<br>(0.83-1.01) | 1.02<br>(0.93-1.12) | 0.93<br>(0.85-1.02) | 1.01<br>(0.93-1.11) | 0.95<br>(0.87-1.02) | 0.95<br>(0.87-1.04) | 0.92<br>(0.83-1.02) | 1.02<br>(0.93-1.12) |
| Utrecht                       | 0.90<br>(0.83-0.98) | 1.32<br>(1.25-1.41) | 0.97<br>(0.89-1.06) | 1.16<br>(1.09-1.24) | 1.03<br>(0.95-1.12) | 1.13<br>(1.05-1.20) | 1.02<br>(0.94-1.10) | 1.13<br>(1.05-1.21) | 0.98<br>(0.90-1.07) | 1.16<br>(1.08-1.24) |
| Twente                        | 1.02<br>(0.86-1.20) | 1.13<br>(1.04-1.22) | 1.05<br>(0.89-1.25) | 1.05<br>(0.96-1.15) | 1.07<br>(0.96-1.20) | 1.01<br>(0.92-1.11) | 1.03<br>(0.92-1.17) | 1.04<br>(0.94-1.14) | 1.07<br>(0.90-1.26) | 1.06<br>(0.97-1.16) |
| Rotterdam-<br>Rijnmond        | 0.95<br>(0.87-1.03) | 1.10<br>(1.03-1.17) | 1.03<br>(0.94-1.14) | 1.04<br>(0.97-1.12) | 1.09<br>(1.01-1.19) | 1.01<br>(0.94-1.09) | 1.06<br>(0.98-1.15) | 1.03<br>(0.96-1.11) | 1.04<br>(0.94-1.14) | 1.03<br>(0.96-1.11) |
| Noord- en Oost-<br>Gelderland | 0.94<br>(0.86-1.02) | 1.19<br>(1.11-1.28) | 0.95<br>(0.87-1.04) | 1.22<br>(1.13-1.31) | 1.01<br>(0.94-1.10) | 1.17<br>(1.09-1.27) | 0.96<br>(0.88-1.03) | 1.24<br>(1.15-1.34) | 0.96<br>(0.87-1.05) | 1.22<br>(1.13-1.32) |
| Limburg-Noord                 | 0.99<br>(0.89-1.12) | 0.96<br>(0.89-1.04) | 1.03<br>(0.89-1.20) | 1.00<br>(0.92-1.08) | 1.07<br>(0.90-1.26) | 0.97<br>(0.89-1.05) | 1.02<br>(0.92-1.13) | 0.97<br>(0.89-1.06) | 1.04<br>(0.89-1.21) | 0.99<br>(0.91-1.08) |
| Kennemerland                  | 0.92<br>(0.84-1.02) | 1.16<br>(1.08-1.26) | 0.97<br>(0.87-1.07) | 1.13<br>(1.04-1.23) | 1.07<br>(0.96-1.19) | 1.08<br>(1.00-1.18) | 1.03<br>(0.95-1.12) | 1.09<br>(1.00-1.19) | 0.98<br>(0.88-1.09) | 1.13<br>(1.04-1.22) |
| IJsselland                    | 1.02<br>(0.92-1.14) | 1.40<br>(1.28-1.53) | 1.08<br>(0.97-1.20) | 1.27<br>(1.15-1.40) | 1.16<br>(1.05-1.29) | 1.24<br>(1.13-1.37) | 1.07<br>(0.97-1.17) | 1.31<br>(1.18-1.44) | 1.09<br>(0.97-1.21) | 1.27<br>(1.15-1.40) |
| Hollands Noorden              | 0.88<br>(0.80-0.96) | 1.31<br>(1.22-1.41) | 0.89<br>(0.81-0.99) | 1.35<br>(1.24-1.46) | 0.92<br>(0.85-1.01) | 1.31<br>(1.21-1.41) | 0.92<br>(0.84-1.00) | 1.31<br>(1.21-1.42) | 0.90<br>(0.82-1.00) | 1.34<br>(1.24-1.46) |
| Holland-Midden                | 0.92<br>(0.84-1.00) | 1.23<br>(1.15-1.32) | 0.96<br>(0.88-1.05) | 1.17<br>(1.08-1.25) | 1.00<br>(0.93-1.09) | 1.12<br>(1.04-1.21) | 0.94<br>(0.87-1.02) | 1.19<br>(1.11-1.29) | 0.96<br>(0.88-1.06) | 1.17<br>(1.09-1.26) |
| Hart voor Brabant             | 0.94<br>(0.80-1.11) | 1.07<br>(1.00-1.15) | 1.03<br>(0.82-1.30) | 1.03<br>(0.96-1.12) | 1.13<br>(0.86-1.49) | 1.03<br>(0.95-1.11) | 1.02<br>(0.88-1.19) | 0.99<br>(0.92-1.07) | 1.05<br>(0.82-1.33) | 1.03<br>(0.96-1.12) |
| Haaglanden                    | 0.99<br>(0.89-1.10) | 1.05<br>(0.98-1.14) | 1.07<br>(0.96-1.19) | 0.95<br>(0.88-1.04) | 1.15<br>(1.03-1.29) | 0.93<br>(0.85-1.01) | 1.09<br>(0.99-1.19) | 0.97<br>(0.89-1.05) | 1.07<br>(0.96-1.20) | 0.96<br>(0.88-1.05) |
| Groningen                     | 0.93<br>(0.83-1.04) | 1.41<br>(1.31-1.53) | 0.98<br>(0.87-1.11) | 1.28<br>(1.17-1.39) | 1.02<br>(0.91-1.14) | 1.24<br>(1.14-1.35) | 0.98<br>(0.87-1.09) | 1.31<br>(1.20-1.43) | 1.00<br>(0.88-1.13) | 1.27<br>(1.16-1.38) |
| Gooi en<br>Vechtstreek        | 0.95<br>(0.85-1.07) | 1.15<br>(1.04-1.27) | 0.97<br>(0.85-1.10) | 1.18<br>(1.06-1.31) | 1.07<br>(0.94-1.22) | 1.13<br>(1.02-1.26) | 0.99<br>(0.90-1.10) | 1.12<br>(1.01-1.25) | 0.98<br>(0.86-1.10) | 1.17<br>(1.06-1.30) |
| Gelderland-Zuid               | 1.02<br>(0.89-1.17) | 1.38<br>(1.28-1.49) | 1.10<br>(0.93-1.31) | 1.28<br>(1.18-1.39) | 1.14<br>(0.95-1.38) | 1.23<br>(1.14-1.34) | 1.06<br>(0.95-1.19) | 1.25<br>(1.15-1.36) | 1.09<br>(0.94-1.25) | 1.28<br>(1.18-1.39) |

|                   |                     |                     |                     |                     |                     |                     |                     |                     |                     |                     |
|-------------------|---------------------|---------------------|---------------------|---------------------|---------------------|---------------------|---------------------|---------------------|---------------------|---------------------|
| Gelderland-Midden | 0.88<br>(0.79-0.97) | 1.22<br>(1.11-1.34) | 0.90<br>(0.81-1.01) | 1.15<br>(1.04-1.27) | 0.98<br>(0.87-1.10) | 1.11<br>(1.01-1.23) | 0.94<br>(0.85-1.04) | 1.17<br>(1.06-1.29) | 0.91<br>(0.81-1.01) | 1.16<br>(1.05-1.28) |
| Friesland         | 0.94<br>(0.84-1.05) | 1.33<br>(1.24-1.44) | 0.96<br>(0.84-1.10) | 1.38<br>(1.27-1.50) | 1.05<br>(0.92-1.21) | 1.32<br>(1.22-1.43) | 0.98<br>(0.89-1.09) | 1.35<br>(1.24-1.47) | 0.98<br>(0.85-1.12) | 1.37<br>(1.27-1.49) |
| Flevoland         | 0.86<br>(0.74-0.99) | 1.11<br>(0.94-1.31) | 0.91<br>(0.79-1.05) | 0.97<br>(0.80-1.18) | 0.99<br>(0.85-1.15) | 0.95<br>(0.78-1.15) | 0.92<br>(0.80-1.06) | 0.98<br>(0.81-1.20) | 0.91<br>(0.79-1.05) | 0.97<br>(0.80-1.18) |
| Drenthe           | 0.89<br>(0.77-1.04) | 1.10<br>(0.99-1.23) | 0.89<br>(0.76-1.03) | 1.16<br>(1.03-1.30) | 0.97<br>(0.86-1.10) | 1.11<br>(0.99-1.24) | 0.95<br>(0.84-1.08) | 1.13<br>(1.00-1.27) | 0.90<br>(0.77-1.05) | 1.15<br>(1.02-1.29) |
| Brabant-Zuidoost  | 0.96<br>(0.88-1.05) | 1.09<br>(1.01-1.17) | 0.99<br>(0.89-1.10) | 1.05<br>(0.97-1.14) | 0.98<br>(0.90-1.06) | 1.06<br>(0.98-1.14) | 1.02<br>(0.94-1.11) | 1.01<br>(0.93-1.09) | 0.99<br>(0.89-1.10) | 1.06<br>(0.98-1.14) |
| Amsterdam         | 0.93<br>(0.81-1.07) | 1.33<br>(1.23-1.44) | 1.08<br>(0.91-1.28) | 1.10<br>(1.01-1.21) | 1.10<br>(0.98-1.23) | 1.04<br>(0.95-1.14) | 1.10<br>(0.96-1.26) | 1.05<br>(0.96-1.15) | 1.06<br>(0.92-1.23) | 1.09<br>(0.99-1.19) |

---

**Table A7 continued.**

| IRR (95% CI)                  | Model 4             |                     | Model 5a            |                     | Model 5b            |                     | Model 5c            |                     | Model 6             |                     |
|-------------------------------|---------------------|---------------------|---------------------|---------------------|---------------------|---------------------|---------------------|---------------------|---------------------|---------------------|
|                               |                     | Infl.               |                     | Infl.               |                     | Infl.               |                     | Infl.               |                     | Infl.               |
| Zuid-Limburg                  | 1.00 (ref)          | 1.00 (ref)          | 1.00 (ref)          | 1.00 (ref)          | 1.00 (ref)          | 1.00 (ref)          | 1.00 (ref)          | 1.00 (ref)          | 1.00 (ref)          | 1.00 (ref)          |
| Zuid-Holland-Zuid             | 0.95<br>(0.87-1.03) | 1.05<br>(0.95-1.16) | 0.95<br>(0.87-1.03) | 1.05<br>(0.95-1.17) | 0.95<br>(0.87-1.03) | 1.05<br>(0.95-1.17) | 0.95<br>(0.87-1.03) | 1.05<br>(0.95-1.16) | 0.94<br>(0.87-1.02) | 1.06<br>(0.96-1.17) |
| Zeeland                       | 0.95<br>(0.87-1.05) | 1.05<br>(0.95-1.16) | 0.97<br>(0.89-1.07) | 1.05<br>(0.95-1.16) | 0.96<br>(0.87-1.05) | 1.05<br>(0.95-1.16) | 0.94<br>(0.86-1.03) | 1.05<br>(0.95-1.16) | 0.96<br>(0.88-1.06) | 1.05<br>(0.95-1.16) |
| Zaanstreek-<br>Waterland      | 1.03<br>(0.95-1.12) | 1.06<br>(0.97-1.15) | 1.04<br>(0.97-1.13) | 1.06<br>(0.97-1.16) | 1.02<br>(0.95-1.11) | 1.07<br>(0.98-1.16) | 1.03<br>(0.96-1.12) | 1.06<br>(0.97-1.15) | 1.03<br>(0.96-1.11) | 1.07<br>(0.98-1.17) |
| West-Brabant                  | 0.94<br>(0.87-1.02) | 0.97<br>(0.88-1.06) | 0.95<br>(0.88-1.03) | 0.97<br>(0.88-1.06) | 0.94<br>(0.87-1.02) | 0.97<br>(0.88-1.06) | 0.94<br>(0.87-1.01) | 0.96<br>(0.88-1.06) | 0.94<br>(0.87-1.01) | 0.97<br>(0.89-1.06) |
| Utrecht                       | 1.05<br>(0.96-1.13) | 1.12<br>(1.04-1.20) | 1.05<br>(0.97-1.14) | 1.12<br>(1.05-1.20) | 1.04<br>(0.96-1.13) | 1.12<br>(1.05-1.20) | 1.04<br>(0.96-1.13) | 1.12<br>(1.04-1.20) | 1.04<br>(0.96-1.13) | 1.13<br>(1.05-1.21) |
| Twente                        | 1.05<br>(0.95-1.17) | 1.02<br>(0.93-1.12) | 1.07<br>(0.97-1.19) | 1.03<br>(0.94-1.13) | 1.05<br>(0.95-1.17) | 1.03<br>(0.94-1.13) | 1.05<br>(0.95-1.17) | 1.02<br>(0.93-1.12) | 1.06<br>(0.96-1.18) | 1.04<br>(0.94-1.14) |
| Rotterdam-<br>Rijnmond        | 1.09<br>(1.01-1.18) | 1.02<br>(0.94-1.09) | 1.10<br>(1.02-1.19) | 1.02<br>(0.95-1.10) | 1.09<br>(1.01-1.18) | 1.02<br>(0.95-1.10) | 1.09<br>(1.01-1.18) | 1.02<br>(0.94-1.09) | 1.09<br>(1.01-1.18) | 1.02<br>(0.95-1.10) |
| Noord- en Oost-<br>Gelderland | 0.99<br>(0.92-1.07) | 1.22<br>(1.13-1.32) | 1.00<br>(0.93-1.08) | 1.23<br>(1.13-1.33) | 0.98<br>(0.91-1.06) | 1.22<br>(1.13-1.33) | 0.99<br>(0.92-1.06) | 1.22<br>(1.12-1.32) | 0.98<br>(0.91-1.05) | 1.23<br>(1.14-1.34) |
| Limburg-Noord                 | 1.05<br>(0.93-1.18) | 0.96<br>(0.89-1.05) | 1.06<br>(0.94-1.20) | 0.97<br>(0.89-1.05) | 1.04<br>(0.93-1.17) | 0.96<br>(0.89-1.05) | 1.04<br>(0.93-1.18) | 0.96<br>(0.89-1.05) | 1.05<br>(0.93-1.18) | 0.97<br>(0.89-1.05) |
| Kennemerland                  | 1.07<br>(0.98-1.17) | 1.07<br>(0.99-1.17) | 1.09<br>(0.99-1.19) | 1.08<br>(1.00-1.18) | 1.07<br>(0.98-1.17) | 1.08<br>(0.99-1.17) | 1.07<br>(0.98-1.17) | 1.07<br>(0.99-1.17) | 1.08<br>(0.99-1.18) | 1.09<br>(1.00-1.18) |
| IJsselnd                      | 1.12<br>(1.01-1.23) | 1.29<br>(1.17-1.42) | 1.12<br>(1.02-1.23) | 1.30<br>(1.18-1.44) | 1.11<br>(1.01-1.22) | 1.30<br>(1.17-1.43) | 1.11<br>(1.01-1.22) | 1.29<br>(1.17-1.42) | 1.1<br>(1.01-1.21)  | 1.31<br>(1.19-1.45) |
| Hollands Noorden              | 0.93<br>(0.86-1.01) | 1.30<br>(1.20-1.41) | 0.95<br>(0.87-1.03) | 1.30<br>(1.20-1.41) | 0.93<br>(0.86-1.00) | 1.30<br>(1.20-1.41) | 0.94<br>(0.87-1.02) | 1.30<br>(1.20-1.41) | 0.95<br>(0.88-1.03) | 1.31<br>(1.21-1.42) |
| Holland-Midden                | 0.98<br>(0.91-1.05) | 1.17<br>(1.08-1.26) | 0.99<br>(0.92-1.06) | 1.18<br>(1.09-1.27) | 0.97<br>(0.90-1.05) | 1.17<br>(1.09-1.26) | 0.97<br>(0.90-1.04) | 1.17<br>(1.08-1.26) | 0.97<br>(0.90-1.04) | 1.18<br>(1.10-1.27) |
| Hart voor Brabant             | 1.07<br>(0.89-1.30) | 1.00<br>(0.92-1.08) | 1.07<br>(0.90-1.26) | 1.00<br>(0.92-1.08) | 1.07<br>(0.89-1.29) | 1.00<br>(0.93-1.08) | 1.08<br>(0.88-1.32) | 1.00<br>(0.92-1.08) | 1.06<br>(0.89-1.26) | 1.00<br>(0.93-1.08) |
| Haaglanden                    | 1.13<br>(1.03-1.24) | 0.95<br>(0.87-1.04) | 1.15<br>(1.04-1.26) | 0.96<br>(0.88-1.04) | 1.13<br>(1.03-1.24) | 0.96<br>(0.88-1.04) | 1.13<br>(1.03-1.24) | 0.95<br>(0.87-1.04) | 1.15<br>(1.04-1.27) | 0.96<br>(0.88-1.05) |
| Groningen                     | 1.00<br>(0.90-1.12) | 1.29<br>(1.19-1.41) | 1.01<br>(0.91-1.13) | 1.30<br>(1.20-1.42) | 1.00<br>(0.89-1.11) | 1.30<br>(1.19-1.42) | 1.00<br>(0.90-1.12) | 1.29<br>(1.19-1.41) | 1.00<br>(0.90-1.11) | 1.31<br>(1.20-1.43) |
| Gooi en<br>Vechtstreek        | 1.04<br>(0.94-1.16) | 1.11<br>(1.00-1.23) | 1.05<br>(0.94-1.18) | 1.10<br>(0.99-1.22) | 1.03<br>(0.93-1.15) | 1.12<br>(1.00-1.24) | 1.05<br>(0.94-1.17) | 1.11<br>(1.00-1.23) | 1.04<br>(0.93-1.16) | 1.11<br>(1.00-1.23) |
| Gelderland-Zuid               | 1.11<br>(0.96-1.27) | 1.24<br>(1.14-1.35) | 1.12<br>(0.97-1.30) | 1.24<br>(1.14-1.34) | 1.10<br>(0.96-1.26) | 1.24<br>(1.14-1.35) | 1.11<br>(0.96-1.27) | 1.24<br>(1.14-1.34) | 1.11<br>(0.96-1.30) | 1.24<br>(1.14-1.35) |
| Gelderland-Midden             | 0.98                | 1.15                | 0.99                | 1.16                | 0.97                | 1.16                | 0.98                | 1.15                | 0.98                | 1.16                |

|                  |             |             |             |             |             |             |             |             |             |             |
|------------------|-------------|-------------|-------------|-------------|-------------|-------------|-------------|-------------|-------------|-------------|
|                  | (0,88-1,08) | (1,04-1,27) | (0,89-1,09) | (1,05-1,28) | (0,88-1,07) | (1,05-1,28) | (0,88-1,09) | (1,04-1,27) | (0,88-1,08) | (1,05-1,29) |
| Friesland        | 1,03        | 1,33        | 1,04        | 1,33        | 1,02        | 1,33        | 1,03        | 1,33        | 1,03        | 1,34        |
|                  | (0,93-1,15) | (1,22-1,44) | (0,94-1,15) | (1,23-1,45) | (0,92-1,13) | (1,23-1,45) | (0,93-1,14) | (1,22-1,44) | (0,93-1,13) | (1,23-1,45) |
| Flevoland        | 0,96        | 0,97        | 0,97        | 0,97        | 0,96        | 0,97        | 0,97        | 0,97        | 0,97        | 0,98        |
|                  | (0,83-1,11) | (0,79-1,18) | (0,84-1,11) | (0,80-1,19) | (0,83-1,11) | (0,80-1,19) | (0,84-1,12) | (0,79-1,18) | (0,83-1,12) | (0,80-1,19) |
| Drenthe          | 0,99        | 1,11        | 1,00        | 1,12        | 0,99        | 1,12        | 0,99        | 1,11        | 0,99        | 1,12        |
|                  | (0,88-1,11) | (0,99-1,25) | (0,89-1,12) | (0,99-1,26) | (0,88-1,11) | (0,99-1,26) | (0,88-1,11) | (0,99-1,25) | (0,89-1,11) | (1,00-1,26) |
| Brabant-Zuidoost | 1,01        | 1,02        | 1,03        | 1,02        | 1,00        | 1,03        | 1,00        | 1,02        | 1,01        | 1,02        |
|                  | (0,93-1,09) | (0,94-1,11) | (0,95-1,11) | (0,94-1,11) | (0,93-1,08) | (0,95-1,11) | (0,92-1,08) | (0,94-1,11) | (0,93-1,09) | (0,95-1,11) |
| Amsterdam        | 1,12        | 1,03        | 1,14        | 1,04        | 1,11        | 1,03        | 1,12        | 1,03        | 1,13        | 1,05        |
|                  | (1,00-1,25) | (0,94-1,13) | (1,01-1,27) | (0,95-1,14) | (0,99-1,25) | (0,94-1,13) | (1,00-1,25) | (0,94-1,13) | (1,00-1,27) | (0,96-1,15) |

IRR: Incidence Rate Ratio. CI: confidence interval. Model 1: region. Model 2: region, demographic factors, and SES. Model 3a: region, demographic factors, SES, and self-rated health. Model 3b: region, demographic factors, SES and chronic disease. Model 3c: region, demographic factors, SES and psychological distress. Model 4: region, demographic factors, SES, self-rated health, chronic disease, and psychological distress. Model 5a: region, demographic factors, SES, self-rated health, chronic disease, psychological distress, and lifestyle. Model 5b: region, demographic factors, SES, self-rated health, chronic disease, psychological distress, and loneliness. Model 5c: region, demographic factors, SES, self-rated health, chronic disease, psychological distress, and mastery. Model 6: region, demographic factors, SES, self-rated health, chronic disease, psychological distress, lifestyle, loneliness, and mastery. Registry data: age, gender, migration background and household income. Self-reported data: marital status, education, income inadequacy, self-rated health, chronic disease, psychological distress, lifestyle, loneliness, and mastery.

**Table A8. Explanation of significant regional differences in GP consult costs by adding lifestyle, loneliness and mastery (model 4 compared to model 6).**

| Region                    | Model 4        |                     | Model 6        |                     | Difference between model 4 and 6 | Average number of citizens aged 19 or older in 2017* | Increase or decrease regional differences in costs |
|---------------------------|----------------|---------------------|----------------|---------------------|----------------------------------|------------------------------------------------------|----------------------------------------------------|
|                           | marginal costs | Difference with ref | marginal costs | Difference with ref |                                  |                                                      |                                                    |
| Zuid-Limburg              | 47,98          | (ref)               | € 47,86        | (ref)               |                                  |                                                      |                                                    |
| Zuid-Holland-Zuid         | € 42,61        | € 5,37              | € 42,41        | € 5,45              | € 0,08                           | 334.140                                              | € 26.346,94                                        |
| Zeeland                   | € 39,21        | € 8,77              | € 38,99        | € 8,87              | € 0,10                           | 306.222                                              | € 30.282,29                                        |
| Zaanstreek-Waterland      | € 42,61        | € 5,37              | € 42,54        | € 5,32              | € -0,05                          | 264.893                                              | -€ 12.638,05                                       |
| West-Brabant              | € 38,84        | € 9,14              | € 38,73        | € 9,13              | € -0,01                          | 562.773                                              | -€ 7.203,49                                        |
| Utrecht                   | € 41,16        | € 6,82              | € 41,23        | € 6,63              | € -0,19                          | 666.844                                              | -€ 127.840,66                                      |
| Twente                    | € 36,71        | € 11,27             | € 36,78        | € 11,08             | € -0,19                          | 494.646                                              | -€ 93.859,08                                       |
| Rotterdam-Rijnmond        | € 37,55        | € 10,43             | € 37,57        | € 10,29             | € -0,14                          | 1.033.491                                            | -€ 148.636,68                                      |
| Noord- en Oost-Gelderland | € 37,92        | € 10,06             | € 37,82        | € 10,04             | € -0,02                          | 649.777                                              | -€ 13.002,04                                       |
| Limburg-Noord             | € 44,02        | € 3,96              | € 43,97        | € 3,89              | € -0,07                          | 421.842                                              | -€ 29.621,75                                       |
| Kennemerland              | € 41,58        | € 6,40              | € 41,72        | € 6,14              | € -0,26                          | 421.650                                              | -€ 109.430,82                                      |
| IJsselland                | € 39,04        | € 8,94              | € 38,89        | € 8,97              | € 0,03                           | 403.397                                              | € 11.258,81                                        |
| Hollands Noorden          | € 38,80        | € 9,18              | € 39,01        | € 8,85              | € -0,33                          | 518.725                                              | -€ 170.183,30                                      |
| Holland-Midden            | € 40,03        | € 7,95              | € 39,80        | € 8,06              | € 0,11                           | 551.554                                              | € 61.277,65                                        |
| Hart voor Brabant         | € 43,74        | € 4,24              | € 43,88        | € 3,98              | € -0,26                          | 843.239                                              | -€ 219.958,89                                      |
| Haaglanden                | € 32,89        | € 15,09             | € 32,92        | € 14,94             | € -0,15                          | 860.697                                              | -€ 132.194,45                                      |
| Groningen                 | € 41,70        | € 6,28              | € 41,73        | € 6,13              | € -0,15                          | 475.810                                              | -€ 73.545,95                                       |
| Gooi en Vechtstreek       | € 43,18        | € 4,80              | € 43,48        | € 4,37              | € -0,43                          | 197.886                                              | -€ 84.410,25                                       |
| Gelderland-Zuid           | € 42,73        | € 5,25              | € 42,68        | € 5,18              | € -0,07                          | 440.023                                              | -€ 31.611,25                                       |
| Gelderland-Midden         | € 40,59        | € 7,39              | € 40,45        | € 7,41              | € 0,02                           | 537.356                                              | € 9.618,67                                         |
| Friesland                 | € 39,12        | € 8,86              | € 39,07        | € 8,78              | € -0,08                          | 511.208                                              | -€ 38.524,63                                       |
| Flevoland                 | € 42,20        | € 5,78              | € 42,25        | € 5,60              | € -0,18                          | 391.288                                              | -€ 69.023,20                                       |
| Drenthe                   | € 39,87        | € 8,11              | € 39,98        | € 7,88              | € -0,23                          | 601.197                                              | -€ 139.736,22                                      |
| Brabant-Zuidoost          | € 41,20        | € 6,78              | € 41,36        | € 6,50              | € -0,28                          | 847.533                                              | -€ 239.097,53                                      |
| Total                     |                |                     |                |                     |                                  |                                                      | -€ 1.601.733,89                                    |

Model 4: region, demographic factors, SES, self-rated health, chronic disease and psychological distress. Model 6: region, demographic factors, SES, self-rated health, chronic disease, psychological distress, lifestyle, loneliness, and mastery. Registry data: age, gender, migration background and household income. Self-reported data: marital status, education, income inadequacy, self-rated health, chronic disease, psychological distress, lifestyle, loneliness and mastery. \* Based on data provided by Statistics Netherlands (opendata.cbs.nl)

**Table A9. Explanation of significant regional differences in mental healthcare costs by adding lifestyle, loneliness and mastery (model 4 compared to model 6).**

| Region            | Model 4        |                     | Model 6        |                     | Difference between model 4 and 6 | Average number of citizens aged 19 or older in 2017* | Increase or decrease regional differences in costs |
|-------------------|----------------|---------------------|----------------|---------------------|----------------------------------|------------------------------------------------------|----------------------------------------------------|
|                   | marginal costs | Difference with ref | marginal costs | Difference with ref |                                  |                                                      |                                                    |
| Zuid-Limburg      | € 215,39       | (ref)               | € 212,84       | (ref)               |                                  |                                                      |                                                    |
| Twente            | € 135,08       | € 80,31             | € 138,40       | € 74,44             | -€ 5,87                          | 494.646                                              | -€ 2.903.572,02                                    |
| Hollands Midden   | € 138,53       | € 76,86             | € 137,70       | € 75,14             | -€ 1,72                          | 551.554                                              | -€ 948.672,88                                      |
| Zuid-Holland-Zuid | € 107,34       | € 108,05            | € 105,40       | € 107,44            | -€ 0,61                          | 334.140                                              | -€ 203.825,40                                      |
| Total             |                |                     |                |                     |                                  |                                                      | -€ 4.056.070,30                                    |

Model 4: region, demographic factors, SES, self-rated health, chronic disease and psychological distress. Model 6: region, demographic factors, SES, self-rated health, chronic disease, psychological distress, lifestyle, loneliness, and mastery. Registry data: age, gender, migration background and household income. Self-reported data: marital status, education, income inadequacy, self-rated health, chronic disease, psychological distress, lifestyle, loneliness and mastery. \* Based on data provided by Statistics Netherlands (opendata.cbs.nl)

**Figure A1. Marginal costs of region for GP consult costs based on unadjusted (model 1) and fully adjusted costs (model 6).**

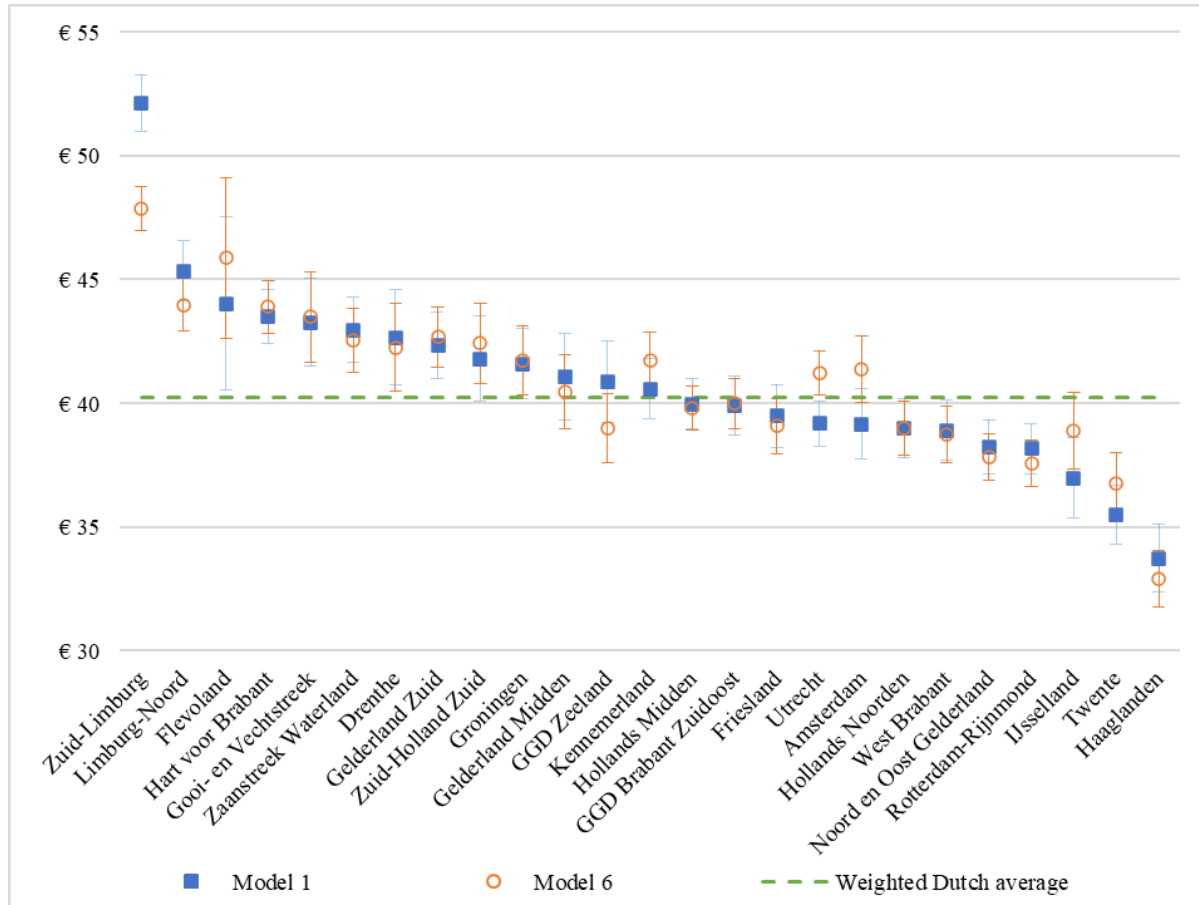

\* Model 1 is adjusted for region only. In model 6, the association of region and healthcare costs is adjusted demographic factors, SES, general and mental health, lifestyle, loneliness and mastery. Registry data: age, gender, migration background and household income. Self-reported data: marital status, education, income inadequacy, self-rated health, chronic disease, psychological distress, lifestyle, loneliness and mastery.

**Figure A2. Marginal costs of region for mental healthcare costs based on unadjusted (model 1) and fully adjusted costs (model 6).**

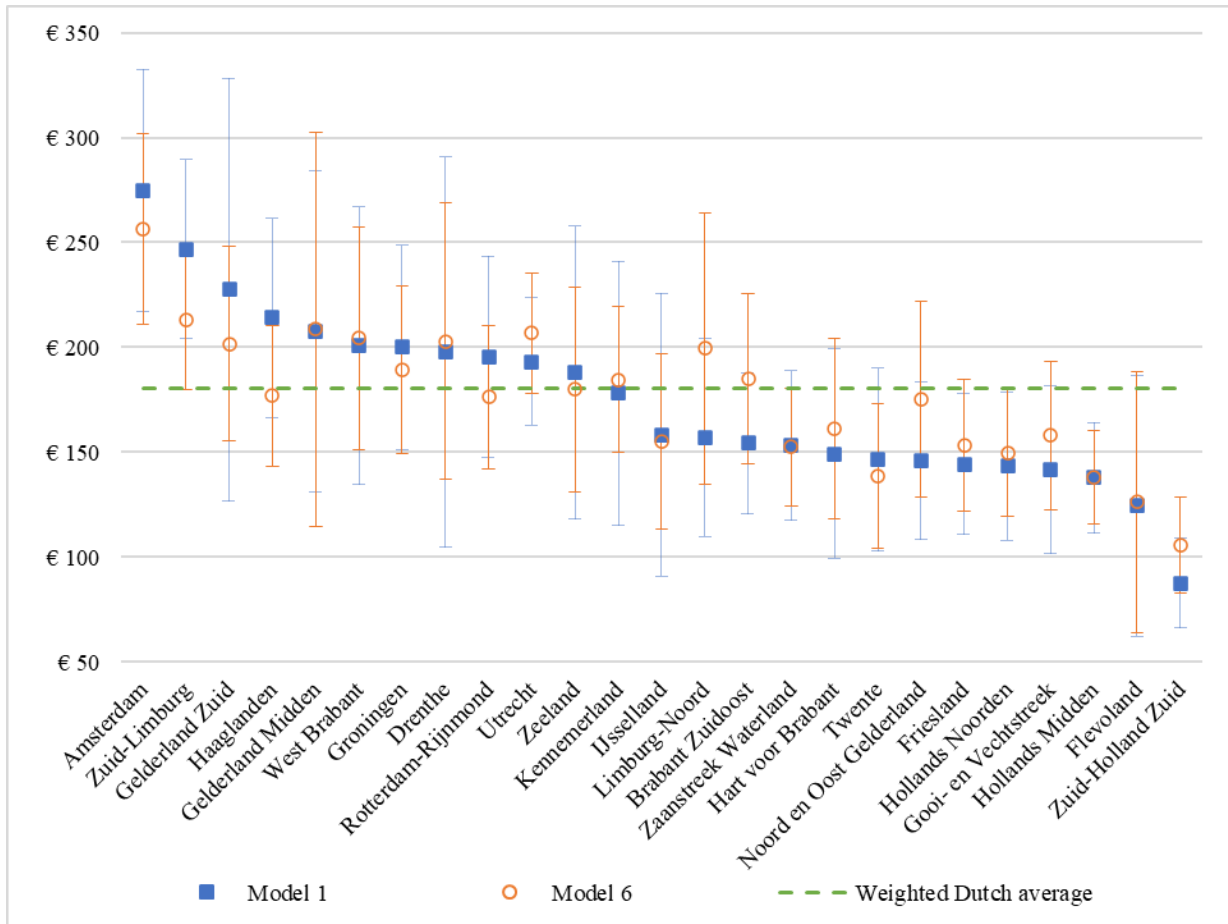

\* Model 1 is adjusted for region only. In model 6, the association of region and healthcare costs is adjusted demographic factors, SES, general and mental health, lifestyle, loneliness and mastery. Registry data: age, gender, migration background and household income. Self-reported data: marital status, education, income inadequacy, self-rated health, chronic disease, psychological distress, lifestyle, loneliness and mastery.

**Figure A3. Marginal costs of region for pharmaceutical costs based on unadjusted (model 1) and fully adjusted costs (model 6).**

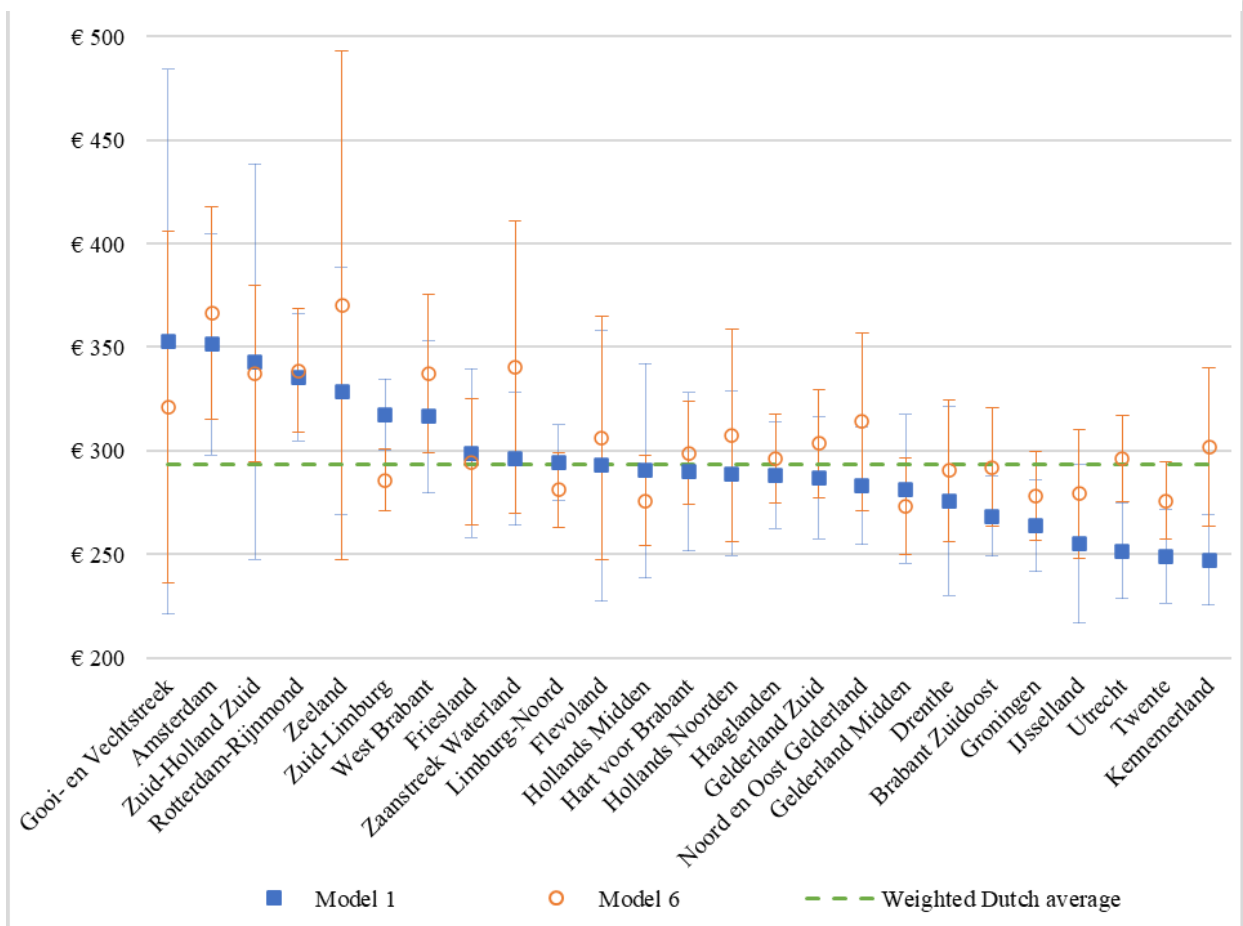

\* Model 1 is adjusted for region only. In model 6, the association of region and healthcare costs is adjusted demographic factors, SES, general and mental health, lifestyle, loneliness and mastery. Registry data: age, gender, migration background and household income. Self-reported data: marital status, education, income inadequacy, self-rated health, chronic disease, psychological distress, lifestyle, loneliness and mastery.



**Figure A4. Marginal costs of region for specialized care costs based on unadjusted (model 1) and fully adjusted costs (model 6).**

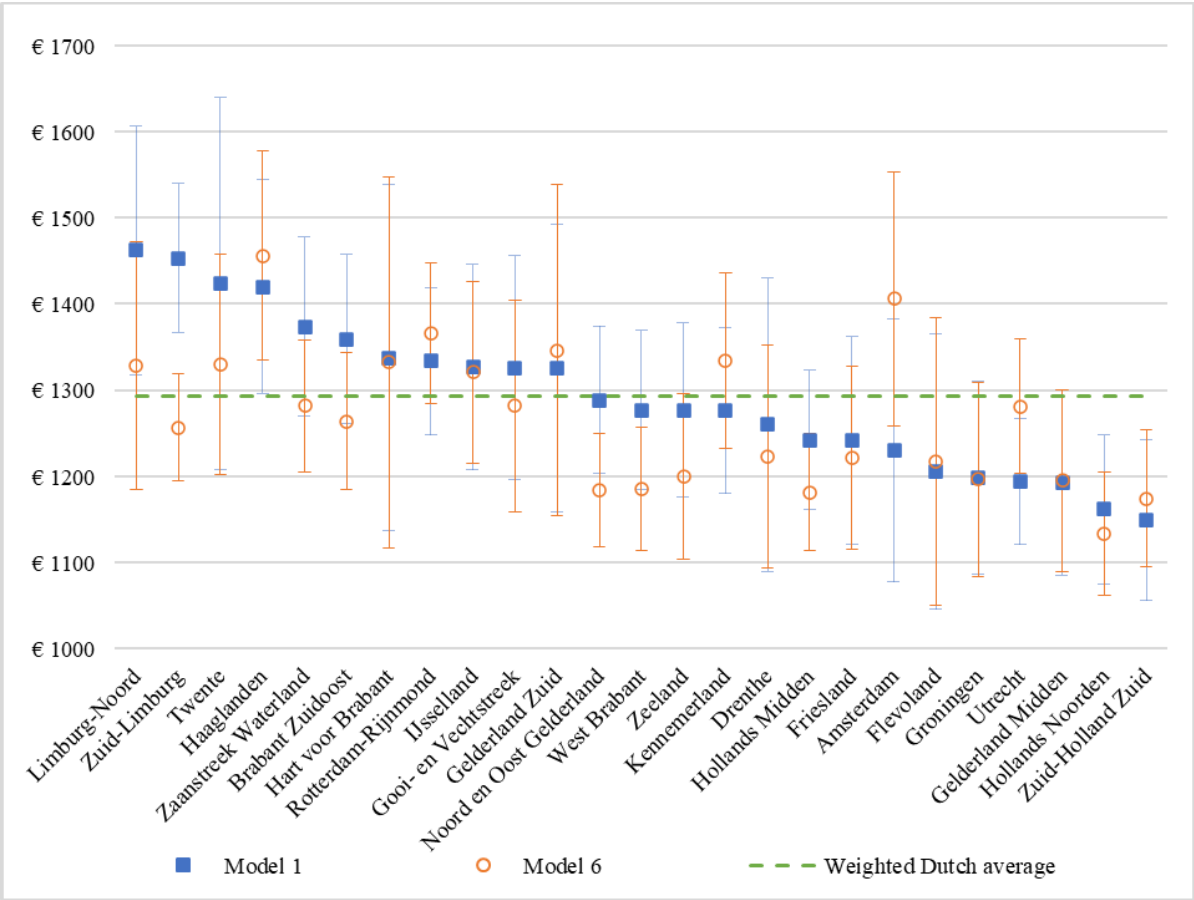

\* Model 1 is adjusted for region only. In model 6, the association of region and healthcare costs is adjusted demographic factors, SES, general and mental health, lifestyle, loneliness and mastery. Registry data: age, gender, migration background and household income. Self-reported data: marital status, education, income inadequacy, self-rated health, chronic disease, psychological distress, lifestyle, loneliness and mastery.
